# Supplementary material for: Imperfect guide-RNA (igRNA) enables CRISPR single-base editing with ABE and CBE
Source: PubMed Central journal article supplement — Nucleic Acids Res. 2022 Mar 29;50(7):4161–70. doi: 10.1093/nar/gkac201 (PMC9023296; doi:10.1093/nar/gkac201), 2022-03-29
Supplement: gkac201_supplemental_file.pdf [file gkac201_supplemental_file.pdf]

## **Supplementary Information**

### **Imperfect guide-RNA (igRNA) enables CRISPR single-base editing with ABE and CBE**

Dongdong Zhao, Guo Jiang, Ju Li, Xuxu Chen, Siwei Li, Jie Wang, Zuping Zhou,  
Shiming Pu, Zhubo Dai, Yanhe Ma, Changhao Bi & Xueli Zhang

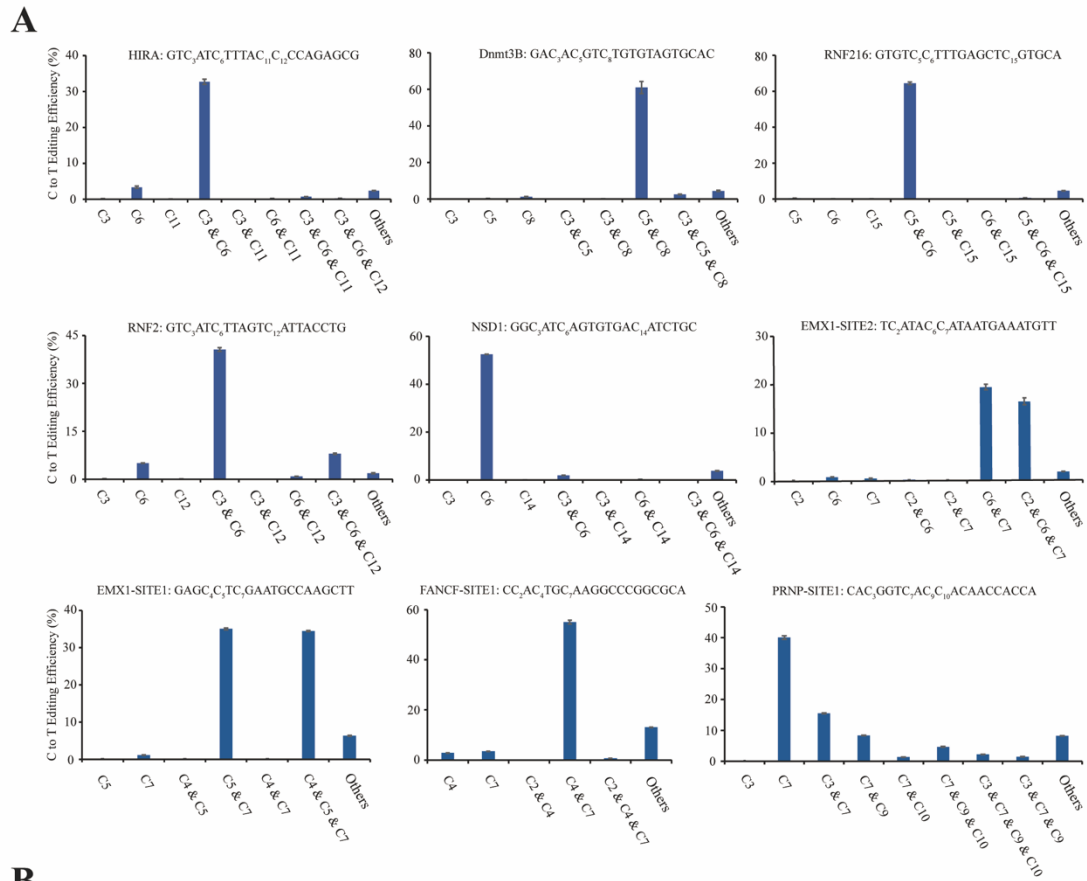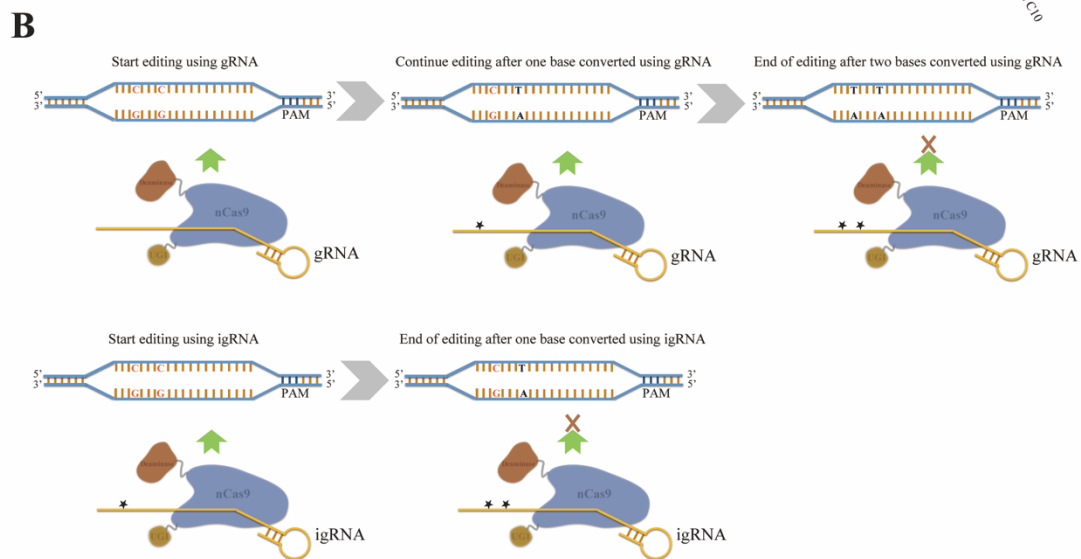

**Supplementary Figure S1. Distribution of the various cytosine base editing products and the schematic diagram of the working principle of igRNA.** **A.** The editing efficiencies of various base editing products demonstrating the distribution of the editing patterns of BE4max at 9 loci in HEK293T cells. The editing results were calculated from the deep sequencing, which provided the sequence of each single DNA strand. **B.** The schematic diagram of the hypothesized working principle of igRNA. The bars represent the average editing specificity, and the error bars represent the s.d. of three independent biological replicates.

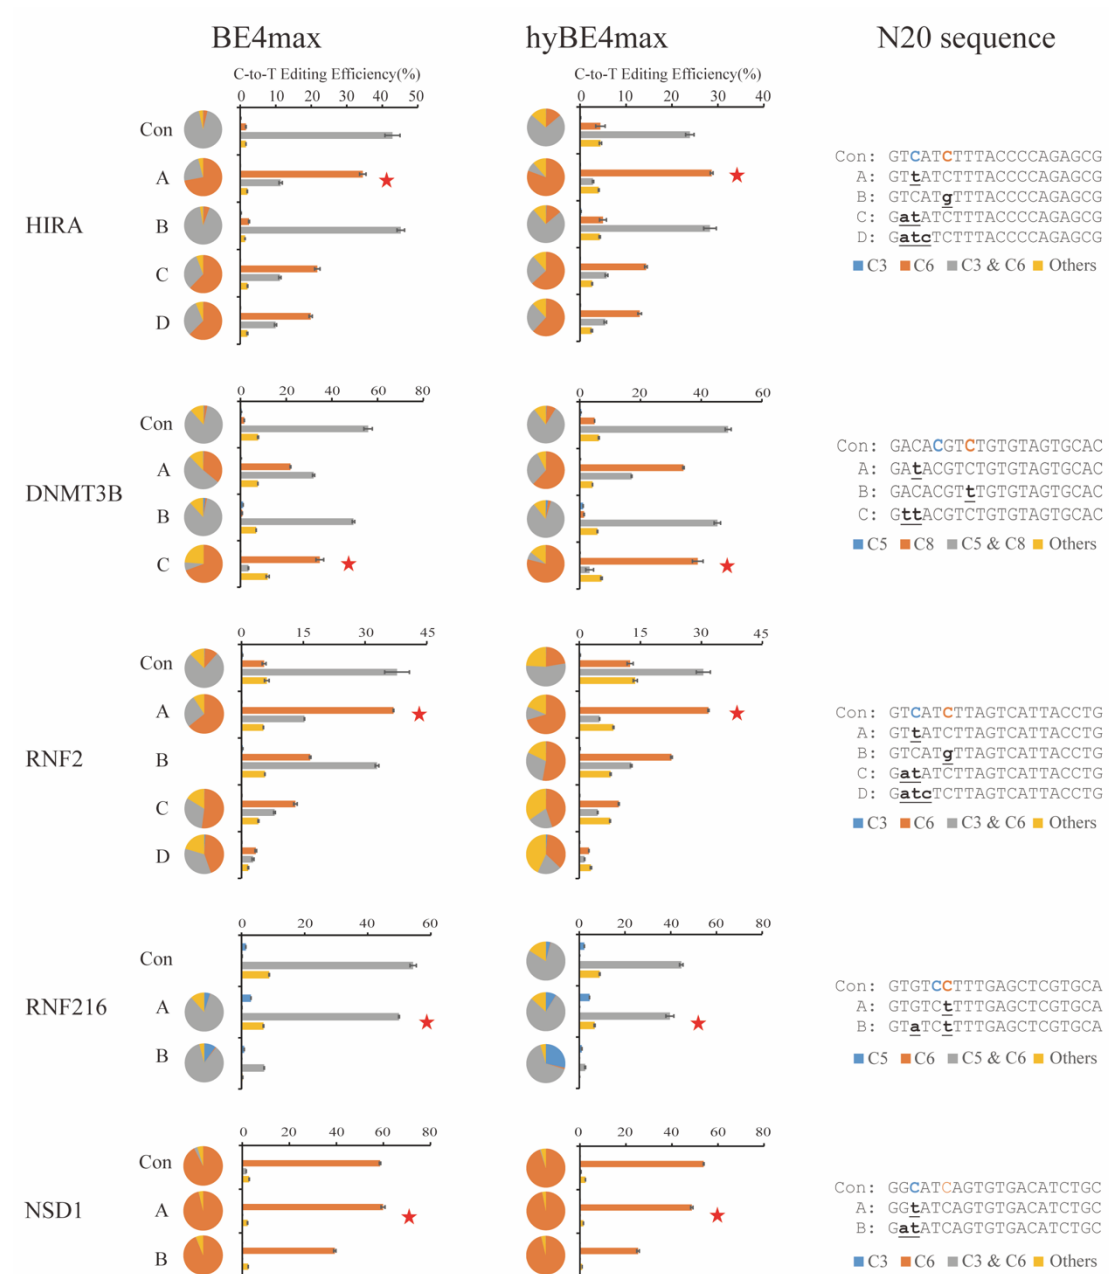

**Supplementary Figure S2. Editing efficiencies and editing product fractions of cytosine base editing with igRNA in HeLa cells.** The base editing efficiency and fractions of editing products were obtained from 5 loci using gRNAs and igRNAs with the BE4max and hyBE4max editors. Con, the control gRNAs that exactly matched the target sequence. Capital A to D, different igRNAs. The red asterisk represents the igRNA with the best performance. The bars represent mean values, and the error bars represent the s.d. of three independent biological replicates. The pie charts represent the fractions of various types of editing products.

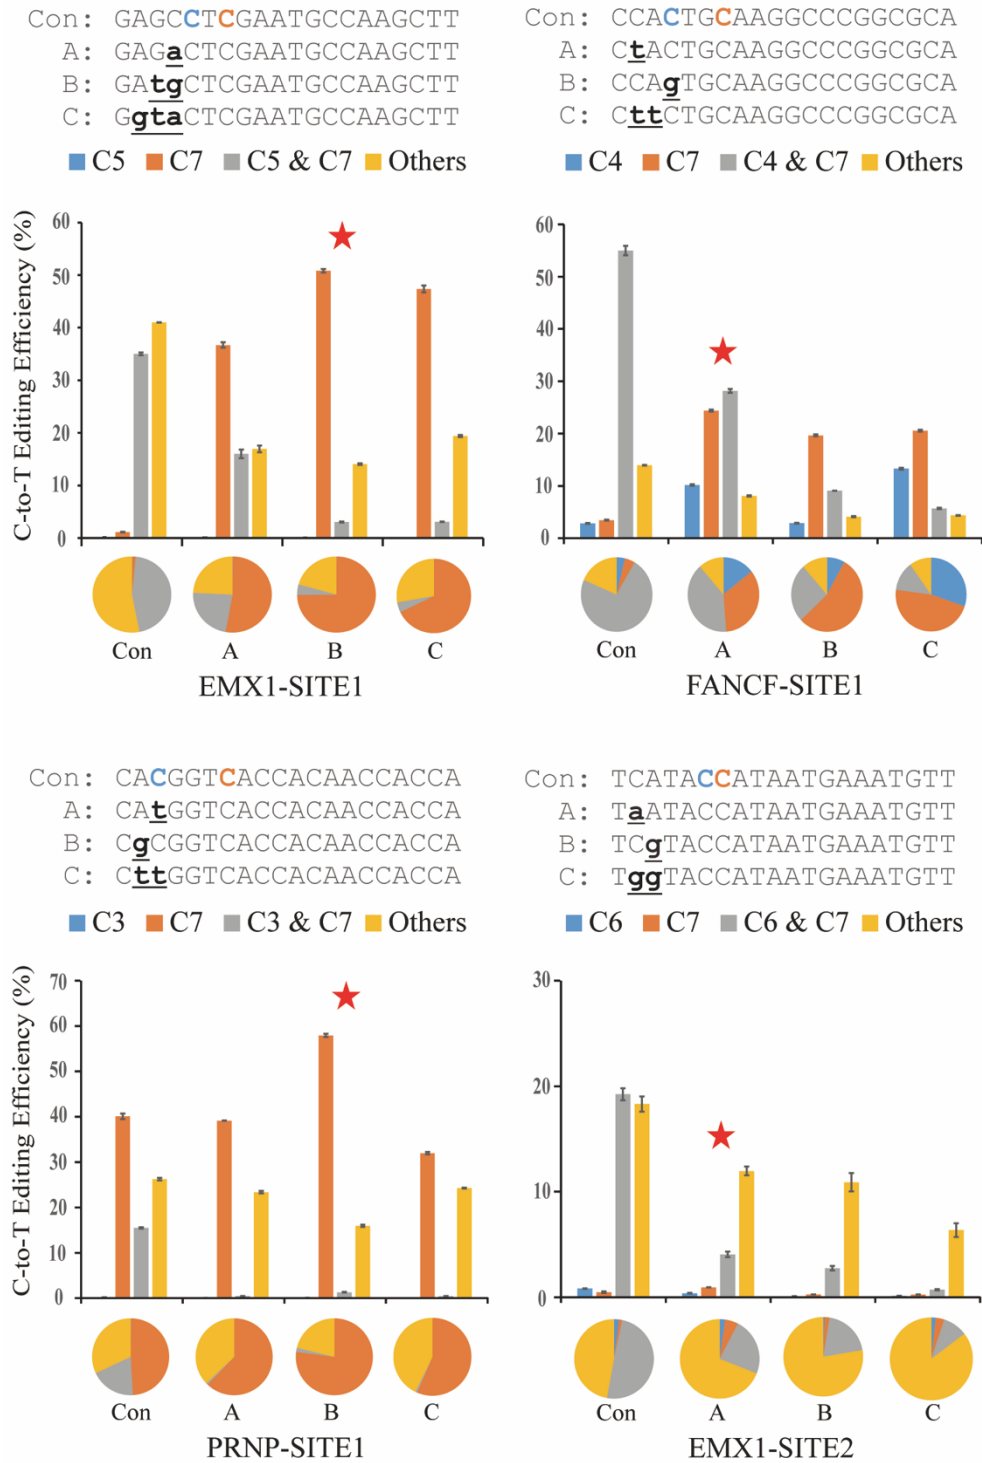

**Supplementary Figure S3. Editing efficiencies and editing product fractions of cytosine base editing with igRNA in HEK293T cells.** The base editing efficiencies and fractions of editing products were obtained from 4 loci using gRNAs and igRNAs with the BE4max editors. Con, the control gRNAs that exactly matched the target sequence. Capital A to C, different igRNAs. The red asterisk represents the igRNA with the best performance. The bars represent mean values, and the error bars represent the s.d. of three independent biological replicates. The pie charts represent the fractions of various types of editing products.

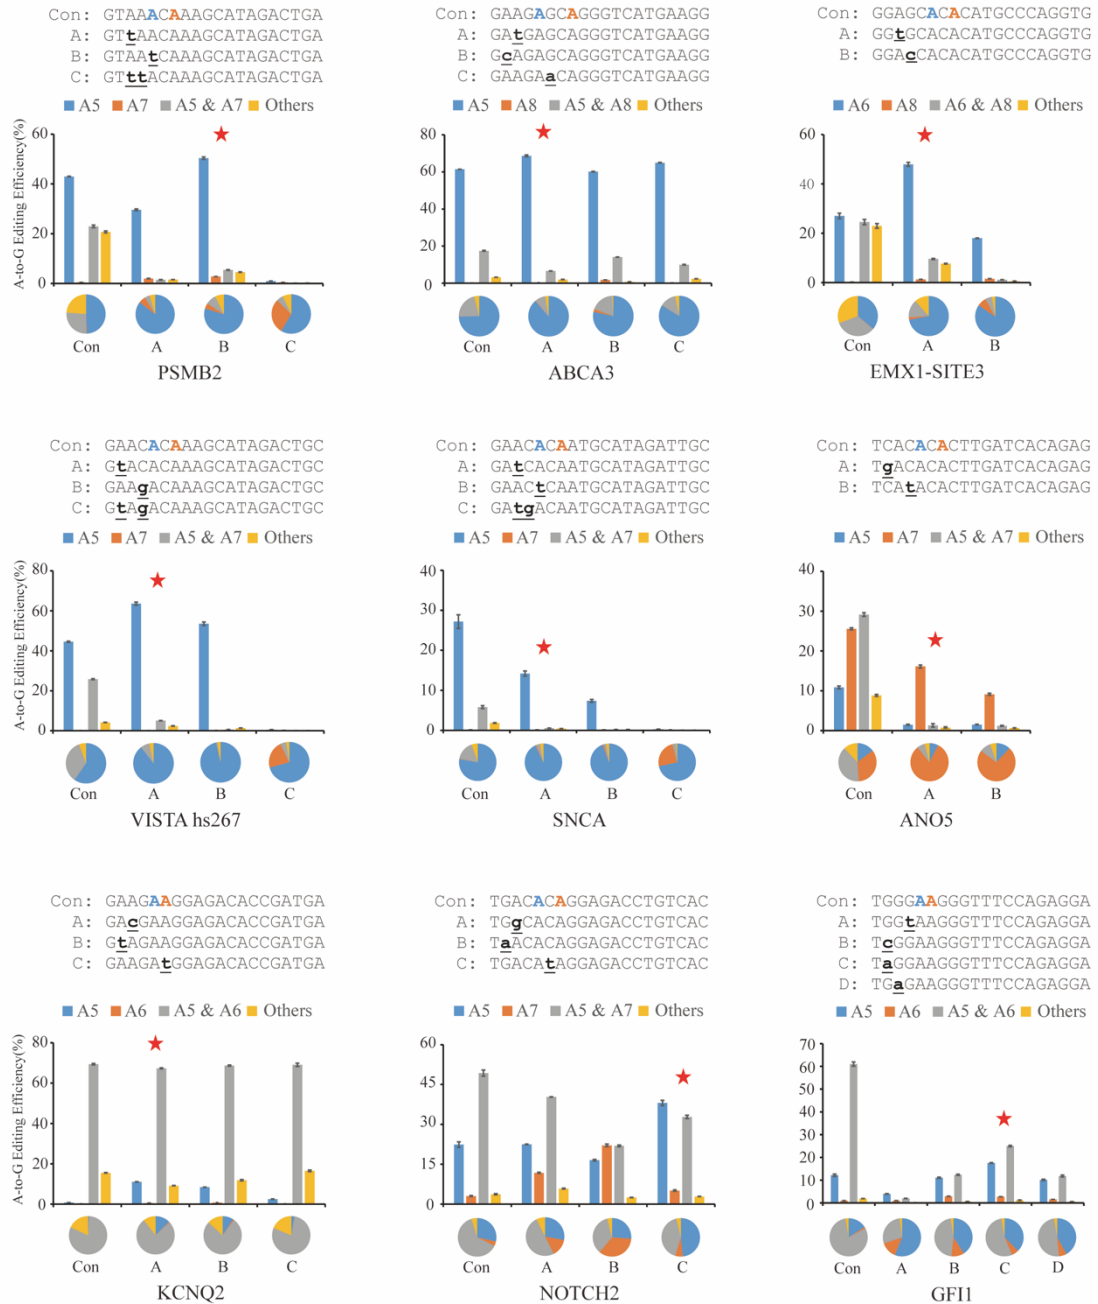

**Supplementary Figure S4. Editing efficiencies and editing product fractions of adenine base editing with igRNA in HeLa cells.** Base editing efficiency and fractions of editing products obtained from 9 loci by the NG-ABEmax editor using gRNAs and igRNAs. Con, the control gRNAs that exactly matched the target sequence. Capital A to D, different igRNAs. The red asterisk represents the igRNA with the best performance. The bars represent mean values, and the error bars represent the s.d. of three independent biological replicates. The pie charts represent the fractions of various types of editing products.

**A**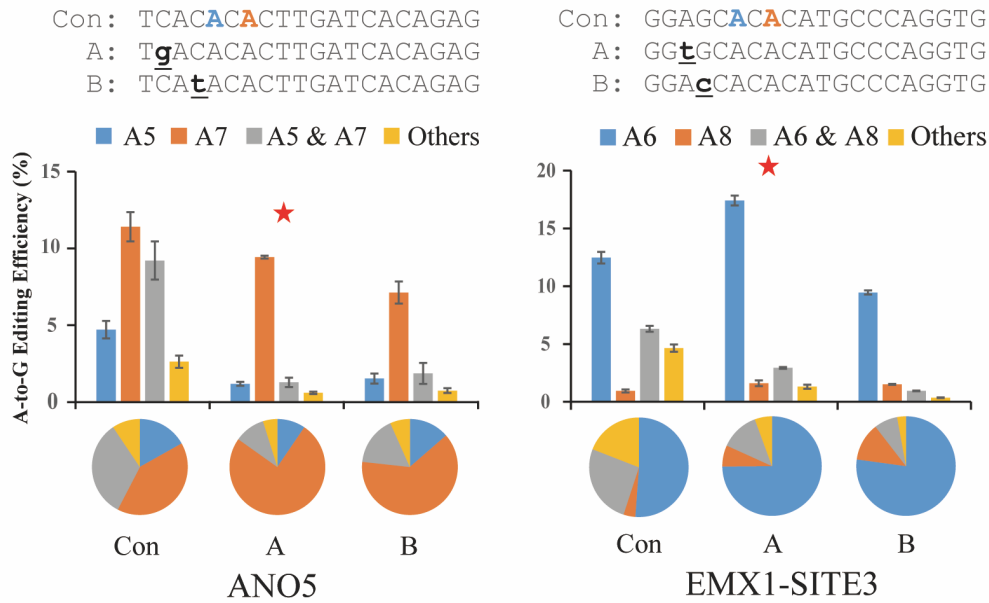**B**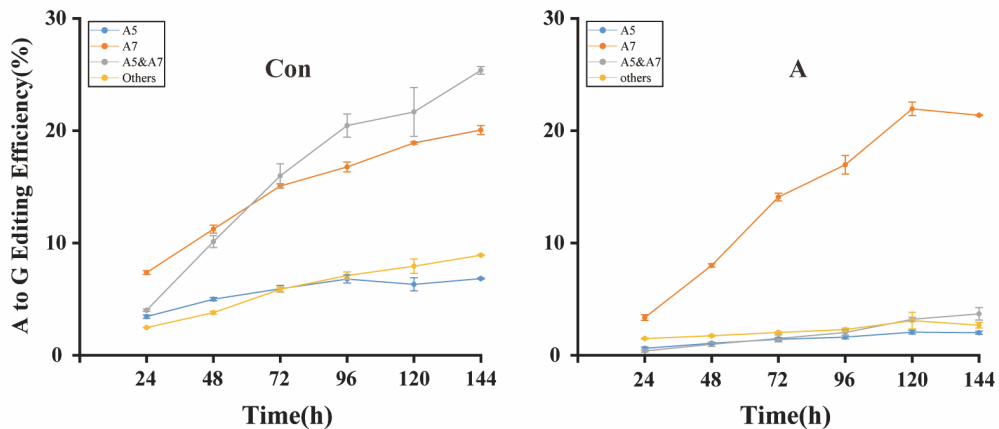

**Supplementary Figure S5. Editing results of adenine base editing at different time points or without selection pressure using igRNA in HEK293T cells. A.** Base editing efficiency and fractions at 2 loci using NG-ABEmax with the corresponding parental gRNA and igRNAs in the absence of puromycin selection. **B.** At the ANO5 loci, the editing efficiency of NG-ABEmax with corresponding parent gRNA and igRNAs at different time points. Con, the control gRNAs that exactly matched the target sequence. Capital A and B, different igRNAs. The red asterisk represents the igRNA with the best performance. The bars represent mean values, and the error bars represent the s.d. of three independent biological replicates. The pie charts represent the fractions of various types of editing products.

Supplementary Table S1. C to T editing fractions of CBEs in HEK293T cells (%)

| Target genes | gRNA & igRNA | Editing fractions of BE4max |                      |             |            | Editing fractions of hyBE4max |                      |            |             |
|--------------|--------------|-----------------------------|----------------------|-------------|------------|-------------------------------|----------------------|------------|-------------|
|              |              | C3                          | C6                   | C3 & C6     | Others     | C3                            | C6                   | C3 & C6    | Others      |
| HIRA         | Con          | 0.32±0.01                   | 8.40±0.66            | 82.17±0.54  | 9.11±0.14  | 0.21±0.03                     | 14.22±0.39           | 51.91±0.33 | 33.66±0.09  |
|              | A            | 0.20±0.01                   | <b>55.75±0.62***</b> | 34.17±0.76  | 9.88±0.36  | 0.11±0.01                     | <b>54.90±0.50***</b> | 12.08±0.37 | 32.91±0.70  |
|              | B            | 0.39±0.05                   | 41.15±13.25          | 49.00±13.42 | 9.47±0.39  | 0.32±0.02                     | 18.53±0.86           | 48.47±0.51 | 32.68±0.42  |
|              | C            | 0.27±0.08                   | 57.08±0.95           | 31.35±0.24  | 11.3±0.70  | 0.16±0.02                     | 52.69±0.93           | 20.61±0.50 | 26.53±0.49  |
|              | D            | 0.45±0.07                   | 58.27±0.80           | 28.75±0.40  | 12.53±0.45 | 0.36±0.11                     | 50.97±1.95           | 21.55±2.71 | 27.12±0.88  |
|              |              |                             | C5                   | C8          | C5 & C8    | Others                        | C5                   | C8         | C5 & C8     |
| DNMT3B       | Con          | 0.46±0.02                   | 1.89±0.07            | 87.57±0.12  | 10.08±0.04 | 0.43±0.04                     | 4.13±0.14            | 86.17±0.23 | 9.27±0.09   |
|              | A            | 0.44±0.01                   | 31.00±0.26           | 58.82±0.28  | 9.74±0.12  | 0.24±0.01                     | 55.61±0.17           | 37.91±0.16 | 6.25±0.07   |
|              | B            | 1.61±0.01                   | 0.97±0.03            | 87.26±0.41  | 10.16±0.43 | 1.43±0.07                     | 1.43±0.03            | 87.88±0.20 | 9.26±0.16   |
|              | C            | 0.11±0.01                   | <b>74.66±0.44***</b> | 10.65±0.16  | 14.57±0.50 | 0.07±0.00                     | <b>84.98±0.14***</b> | 4.62±0.04  | 10.33±0.12  |
| RNF2         | Con          | 0.21±0.06                   | 8.89±0.17            | 71.82±0.55  | 19.08±0.35 | 0.23±0.02                     | 17.63±0.19           | 49.37±0.30 | 32.76±0.23  |
|              | A            | 0.09±0.03                   | <b>54.52±0.27***</b> | 30.24±0.06  | 15.15±0.32 | 0.09±0.04                     | <b>56.45±0.55***</b> | 13.93±0.27 | 29.52±0.50  |
|              | B            | 0.26±0.06                   | 15.82±0.18           | 65.18±0.22  | 18.75±0.22 | 0.22±0.04                     | 24.61±0.42           | 40.07±0.39 | 35.10±0.16  |
|              | C            | 0.14±0.04                   | 31.31±0.18           | 34.33±0.43  | 34.22±0.29 | 0.23±0.14                     | 25.17±0.59           | 21.48±0.28 | 53.12±0.45  |
|              | D            | 0.36±0.05                   | 17.58±0.62           | 33.20±0.54  | 48.86±0.52 | 0.43±0.07                     | 16.87±1.31           | 16.67±0.74 | 66.03±1.62  |
|              |              |                             | C5                   | C6          | C5 & C6    | Others                        | C5                   | C6         | C5 & C6     |
| RNF216       | Con          | 0.70±0.03                   | 0.23±0.01            | 91.49±0.18  | 7.59±0.18  | 0.90±0.20                     | 0.22±0.03            | 68.69±13.2 | 30.19±13.42 |
|              | A            | <b>1.81±0.09***</b>         | 0.21±0.01            | 90.02±0.16  | 7.96±0.24  | <b>3.95±0.23***</b>           | 0.24±0.01            | 84.86±0.30 | 10.95±0.10  |
|              | B            | 2.64±0.24                   | 0.56±0.02            | 88.73±0.08  | 8.07±0.26  | 6.94±0.17                     | 0.73±0.00            | 73.90±0.33 | 18.43±0.16  |
| NSD1         | Con          | 0.04±0.01                   | 89.58±0.27           | 3.31±0.06   | 7.07±0.22  | 0.04±0.01                     | 92.35±0.43           | 0.92±0.09  | 6.69±0.35   |
|              | A            | 0.02±0.01                   | <b>95.06±0.11***</b> | 0.21±0.03   | 4.71±0.07  | 0.06±0.01                     | <b>94.94±0.16***</b> | 0.11±0.01  | 4.89±0.16   |
|              | B            | 0.19±0.04                   | 89.14±0.35           | 0.53±0.03   | 10.15±0.29 | 0.19±0.04                     | 92.56±0.30           | 0.12±0.10  | 7.14±0.22   |
|              |              |                             | C3                   | C6          | C3 & C6    | Others                        | C3                   | C6         | C3 & C6     |

Note: All data are expressed as mean ± s.d. of three independent experiments. The bold represents single-base editing with the best performance, asterisks indicate a significant difference compared with the control (\*\*\*P < 0.001).

Supplementary Table S2. C to T editing efficiency of CBEs in HEK293T cells (%)

| Target genes | gRNA & igRNA | Editing efficiency of BE4max |                      |            |            | Editing efficiency of hyBE4max |                      |            |            |
|--------------|--------------|------------------------------|----------------------|------------|------------|--------------------------------|----------------------|------------|------------|
|              |              | C3                           | C6                   | C3 & C6    | Others     | C3                             | C6                   | C3 & C6    | Others     |
| HIRA         | Con          | 0.13±0.01                    | 3.34±0.29            | 32.70±0.71 | 3.62±0.07  | 0.08±0.01                      | 5.35±0.34            | 19.51±0.57 | 12.65±0.42 |
|              | A            | 0.07±0.00                    | <b>19.72±0.81***</b> | 12.09±0.59 | 3.49±0.04  | 0.04±0.01                      | <b>18.57±0.26***</b> | 4.09±0.07  | 11.13±0.35 |
|              | B            | 0.11±0.01                    | 12.00±4.11           | 14.04±3.38 | 2.73±0.16  | 0.1±0.01                       | 5.75±0.02            | 15.07±0.92 | 10.16±0.64 |
|              | C            | 0.05±0.02                    | 10.79±0.54           | 5.92±0.22  | 2.13±0.09  | 0.04±0.00                      | 11.93±0.55           | 4.67±0.32  | 6.02±0.45  |
|              | D            | 0.06±0.00                    | 7.65±0.94            | 3.77±0.43  | 1.65±0.22  | 0.07±0.02                      | 9.63±0.79            | 4.04±0.35  | 5.12±0.38  |
|              |              |                              | C5                   | C8         | C5 & C8    | Others                         | C5                   | C8         | C5 & C8    |
| DNMT3B       | Con          | 0.32±0.01                    | 1.32±0.08            | 61.01±3.32 | 7.03±0.39  | 0.29±0.02                      | 2.85±0.07            | 59.48±0.92 | 6.40±0.07  |
|              | A            | 0.31±0.01                    | 22.10±0.42           | 41.94±0.38 | 6.95±0.07  | 0.15±0.01                      | 35.44±0.31           | 24.16±0.16 | 3.98±0.03  |
|              | B            | 1.09±0.04                    | 0.66±0.04            | 59.38±1.91 | 6.91±0.41  | 0.91±0.04                      | 0.92±0.03            | 56.27±0.80 | 5.93±0.04  |
|              | C            | 0.07±0.01                    | <b>42.92±0.55***</b> | 6.13±0.17  | 8.38±0.29  | 0.04±0.00                      | <b>49.69±1.03***</b> | 2.70±0.05  | 6.04±0.20  |
| RNF2         | Con          | 0.12±0.03                    | 5.03±0.08            | 40.62±0.58 | 10.79±0.24 | 0.11±0.01                      | 8.60±0.14            | 24.07±0.14 | 15.97±0.27 |
|              | A            | 0.04±0.01                    | <b>26.03±0.62***</b> | 14.44±0.32 | 7.23±0.17  | 0.03±0.01                      | <b>19.37±0.05***</b> | 4.78±0.12  | 10.14±0.27 |
|              | B            | 0.10±0.02                    | 6.29±0.46            | 25.90±1.55 | 7.45±0.48  | 0.08±0.01                      | 9.38±0.19            | 15.27±0.43 | 13.37±0.24 |
|              | C            | 0.04±0.01                    | 7.99±0.24            | 8.75±0.20  | 8.73±0.22  | 0.04±0.02                      | 4.63±0.28            | 3.95±0.20  | 9.76±0.51  |
|              | D            | 0.04±0.01                    | 1.74±0.10            | 3.29±0.28  | 4.85±0.44  | 0.04±0.01                      | 1.69±0.12            | 1.66±0.01  | 6.61±0.43  |
|              |              |                              | C5                   | C6         | C5 & C6    | Others                         | C5                   | C6         | C5 & C6    |
| RNF216       | Con          | 0.49±0.02                    | 0.16±0.01            | 64.46±0.72 | 5.35±0.09  | 0.55±0.12                      | 0.14±0.02            | 41.98±7.15 | 18.69±8.47 |
|              | A            | <b>1.28±0.06***</b>          | 0.15±0.01            | 63.69±0.52 | 5.63±0.19  | <b>2.49±0.13***</b>            | 0.15±0.01            | 53.5±0.64  | 6.90±0.02  |
|              | B            | 0.32±0.02                    | 0.07±0.00            | 10.63±0.27 | 0.97±0.05  | 0.52±0.01                      | 0.05±0.00            | 5.57±0.08  | 1.39±0.00  |
| NSD1         | Con          | 0.02±0.01                    | 52.49±0.06           | 1.94±0.04  | 4.14±0.14  | 0.03±0.01                      | 54.19±1.44           | 0.54±0.07  | 3.93±0.32  |
|              | A            | 0.01±0.01                    | <b>59.34±0.18***</b> | 0.13±0.02  | 2.94±0.06  | 0.03±0.00                      | <b>47.03±0.60</b>    | 0.05±0.00  | 2.42±0.10  |
|              | B            | 0.04±0.01                    | 20.56±0.07           | 0.12±0.01  | 2.34±0.08  | 0.04±0.01                      | 21.59±0.86           | 0.03±0.03  | 1.67±0.11  |
|              |              |                              | C3                   | C6         | C3 & C6    | Others                         | C3                   | C6         | C3 & C6    |

Note: All data are expressed as mean ± s.d. of three independent experiments. The bold represents single-base editing with the best performance, asterisks indicate a significant difference compared with the control (\*\*\*P < 0.001).



Supplementary Table S3. C to T editing fractions of CBEs in HeLa cells (%)

| Target genes | gRNA & igRNA | Editing fractions of BE4max |                      |            |            | Editing fractions of hyBE4max |                      |            |            |
|--------------|--------------|-----------------------------|----------------------|------------|------------|-------------------------------|----------------------|------------|------------|
|              |              | C3                          | C6                   | C3 & C6    | Others     | C3                            | C6                   | C3 & C6    | Others     |
| HIRA         | Con          | 0.42±0.04                   | 3.47±0.04            | 92.58±0.13 | 3.52±0.12  | 0.41±0.03                     | 13.45±3.18           | 72.63±2.58 | 13.51±0.73 |
|              | A            | 0.11±0.02                   | <b>72.00±0.39***</b> | 23.73±0.36 | 4.17±0.04  | 0.11±0.00                     | <b>80.51±0.51***</b> | 7.93±0.34  | 11.45±0.20 |
|              | B            | 0.59±0.06                   | 5.02±0.27            | 91.62±0.28 | 2.76±0.04  | 0.67±0.03                     | 13.14±1.43           | 74.86±0.94 | 11.33±0.47 |
|              | C            | 0.16±0.03                   | 62.03±0.16           | 31.95±0.13 | 5.86±0.14  | 0.22±0.03                     | 62.96±0.83           | 25.25±0.77 | 11.57±0.08 |
|              | D            | 0.30±0.02                   | 62.22±0.76           | 31.17±0.55 | 6.31±0.27  | 0.31±0.05                     | 61.57±0.57           | 26.06±0.26 | 12.06±0.33 |
|              | Con          | 0.73±0.03                   | 2.51±0.07            | 85.04±0.28 | 11.71±0.25 | 0.74±0.06                     | 8.07±0.12            | 80.83±0.30 | 10.37±0.28 |
| DNMT3B       | A            | 0.58±0.03                   | 35.36±0.16           | 51.76±0.25 | 12.30±0.12 | 0.36±0.01                     | 61.43±0.07           | 30.67±0.06 | 7.53±0.13  |
|              | B            | 1.97±0.03                   | 1.35±0.07            | 84.93±0.19 | 11.75±0.14 | 2.04±0.12                     | 2.63±0.16            | 84.53±0.51 | 10.80±0.25 |
|              | C            | 0.15±0.02                   | <b>69.24±0.09***</b> | 6.88±0.17  | 23.73±0.16 | 0.18±0.04                     | <b>78.73±2.50***</b> | 6.59±2.68  | 14.50±0.25 |
|              | Con          | 0.54±0.06                   | 11.01±0.09           | 76.09±0.22 | 12.36±0.18 | 0.40±0.06                     | 21.93±0.19           | 53.52±0.27 | 24.15±0.37 |
| RNF2         | A            | 0.11±0.01                   | <b>64.15±0.10***</b> | 26.52±0.12 | 9.22±0.03  | 0.12±0.00                     | <b>70.30±0.13***</b> | 11.01±0.12 | 18.56±0.22 |
|              | B            | 0.55±0.05                   | 30.01±0.02           | 59.23±0.11 | 10.22±0.04 | 0.47±0.01                     | 52.34±0.38           | 29.43±0.23 | 17.76±0.16 |
|              | C            | 0.29±0.02                   | 51.77±0.61           | 31.71±0.25 | 16.23±0.37 | 0.41±0.03                     | 44.38±0.30           | 20.55±0.12 | 34.65±0.23 |
|              | D            | 0.98±0.07                   | 43.56±1.37           | 35.06±1.70 | 20.40±0.39 | 1.30±0.08                     | 35.91±1.05           | 19.62±0.50 | 43.17±0.87 |
|              | Con          | 2.12±0.05                   | 0.33±0.01            | 83.17±0.18 | 0.00±0.00  | 3.88±0.12                     | 0.36±0.02            | 79.82±0.07 | 15.94±0.07 |
|              | A            | <b>4.91±0.03***</b>         | 0.26±0.02            | 82.29±0.18 | 0.00±0.00  | <b>8.78±0.28***</b>           | 0.25±0.03            | 77.84±0.37 | 13.14±0.17 |
| RNF216       | B            | 9.62±0.21                   | 0.63±0.16            | 82.91±0.64 | 0.00±0.00  | 28.55±0.49                    | 1.06±0.11            | 65.8±0.74  | 4.59±0.40  |
|              | Con          | 0.00±0.00                   | 92.51±0.07           | 2.73±0.01  | 4.76±0.07  | 0.02±0.00                     | 94.94±0.11           | 0.81±0.05  | 4.23±0.06  |
|              | A            | 0.00±0.00                   | <b>96.23±0.08***</b> | 0.14±0.02  | 3.63±0.07  | 0.05±0.01                     | <b>96.84±0.01***</b> | 0.10±0.01  | 3.02±0.02  |
| NSD1         | B            | 0.09±0.01                   | 93.72±0.05           | 0.18±0.00  | 6.01±0.04  | 0.19±0.02                     | 95.98±0.09           | 0.13±0.01  | 3.70±0.10  |

Note: All data are expressed as mean ± s.d. of three independent experiments. The bold represents single-base editing with the best performance, asterisks indicate a significant difference compared with the control (\*\*\*P < 0.001).

Supplementary Table S4. C to T editing efficiency of CBEs in HeLa cells (%)

| Target genes | gRNA & igRNA | Editing efficiency of BE4max |                      |            |            | Editing efficiency of hyBE4max |                      |            |            |
|--------------|--------------|------------------------------|----------------------|------------|------------|--------------------------------|----------------------|------------|------------|
|              |              | C3                           | C6                   | C3 & C6    | Others     | C3                             | C6                   | C3 & C6    | Others     |
| HIRA         |              | C3                           | C6                   | C3 & C6    | Others     | C3                             | C6                   | C3 & C6    | Others     |
|              | Con          | 0.20±0.02                    | 1.61±0.07            | 42.87±2.11 | 1.63±0.04  | 0.13±0.01                      | 4.42±1.03            | 23.9±0.91  | 4.45±0.27  |
|              | A            | 0.05±0.01                    | <b>34.52±0.89***</b> | 11.38±0.46 | 2.00±0.07  | 0.04±0.00                      | <b>28.64±0.31***</b> | 2.82±0.14  | 4.07±0.07  |
|              | B            | 0.29±0.03                    | 2.48±0.12            | 45.22±1.05 | 1.36±0.05  | 0.25±0.01                      | 4.98±0.76            | 28.27±1.37 | 4.27±0.15  |
|              | C            | 0.06±0.01                    | 21.70±0.75           | 11.17±0.32 | 2.05±0.10  | 0.05±0.00                      | 14.34±0.28           | 5.76±0.29  | 2.64±0.07  |
|              | D            | 0.10±0.01                    | 19.85±0.47           | 9.95±0.31  | 2.02±0.13  | 0.07±0.01                      | 12.97±0.37           | 5.50±0.26  | 2.55±0.17  |
| DNMT3B       |              | C5                           | C8                   | C5 & C8    | Others     | C5                             | C8                   | C5 & C8    | Others     |
|              | Con          | 0.48±0.02                    | 1.65±0.03            | 55.86±1.85 | 7.69±0.21  | 0.45±0.03                      | 4.88±0.04            | 48.87±0.98 | 6.27±0.17  |
|              | A            | 0.36±0.02                    | 21.84±0.17           | 31.98±0.47 | 7.60±0.02  | 0.20±0.01                      | 34.16±0.23           | 17.06±0.14 | 4.19±0.05  |
|              | B            | 1.15±0.03                    | 0.79±0.03            | 49.43±0.55 | 6.84±0.04  | 1.09±0.05                      | 1.41±0.07            | 45.33±1.05 | 5.79±0.11  |
|              | C            | 0.08±0.01                    | <b>34.7±1.68***</b>  | 3.45±0.12  | 11.90±0.66 | 0.09±0.02                      | <b>38.85±1.77***</b> | 3.24±1.31  | 7.16±0.27  |
| RNF2         |              | C3                           | C6                   | C3 & C6    | Others     | C3                             | C6                   | C3 & C6    | Others     |
|              | Con          | 0.27±0.01                    | 5.47±0.48            | 37.77±3.02 | 6.14±0.57  | 0.23±0.02                      | 12.5±0.74            | 30.48±1.72 | 13.74±0.51 |
|              | A            | 0.06±0.00                    | <b>36.9±0.09***</b>  | 15.26±0.06 | 5.30±0.02  | 0.05±0.00                      | <b>31.74±0.15***</b> | 4.97±0.05  | 8.38±0.11  |
|              | B            | 0.30±0.02                    | 16.67±0.18           | 32.89±0.44 | 5.68±0.05  | 0.20±0.00                      | 22.65±0.22           | 12.74±0.21 | 7.69±0.15  |
|              | C            | 0.07±0.00                    | 13.08±0.42           | 8.01±0.22  | 4.10±0.11  | 0.09±0.01                      | 9.73±0.10            | 4.48±0.09  | 7.53±0.10  |
|              | D            | 0.08±0.00                    | 3.45±0.19            | 2.78±0.24  | 1.62±0.10  | 0.08±0.00                      | 2.36±0.04            | 1.24±0.01  | 2.75±0.12  |
| RNF216       |              | C5                           | C6                   | C5 & C6    | Others     | C5                             | C6                   | C5 & C6    | Others     |
|              | Con          | 1.38±0.01                    | 0.22±0.01            | 54.41±1.00 | 8.78±0.09  | 2.17±0.05                      | 0.20±0.01            | 44.62±0.76 | 8.91±0.18  |
|              | A            | <b>2.98±0.02***</b>          | 0.15±0.01            | 49.93±0.12 | 6.96±0.09  | <b>4.46±0.03***</b>            | 0.13±0.02            | 39.61±1.72 | 6.68±0.26  |
|              | B            | 0.83±0.02                    | 0.05±0.01            | 7.18±0.07  | 0.34±0.05  | 1.1±0.09                       | 0.04±0.00            | 2.54±0.23  | 0.18±0.00  |
| NSD1         |              | C3                           | C6                   | C3 & C6    | Others     | C3                             | C6                   | C3 & C6    | Others     |
|              | Con          | 0.00±0.00                    | 58.56±0.33           | 1.73±0.00  | 2.97±0.07  | 0.01±0.00                      | 53.79±0.16           | 0.46±0.03  | 2.39±0.04  |
|              | A            | 0.00±0.00                    | <b>59.84±0.85</b>    | 0.09±0.01  | 2.26±0.06  | 0.02±0.00                      | <b>48.62±0.50</b>    | 0.05±0.00  | 1.52±0.02  |
|              | B            | 0.04±0.01                    | 39.32±0.48           | 0.08±0.00  | 2.52±0.05  | 0.05±0.01                      | 25.27±0.56           | 0.04±0.00  | 0.97±0.02  |

Note: All data are expressed as mean ± s.d. of three independent experiments. The bold represents single-base editing with the best performance, asterisks indicate a significant difference compared with the control (\*\*\*P < 0.001).

Supplementary Table S5. C to T editing fractions and efficiency of BE4max in HEK293T cells (%)

| Target genes | gRNA & igRNA | Editing fractions of BE4max |                      |            |            | Editing efficiency of BE4max |                      |            |            |
|--------------|--------------|-----------------------------|----------------------|------------|------------|------------------------------|----------------------|------------|------------|
|              |              | C5                          | C7                   | C5 & C7    | Others     | C5                           | C7                   | C5 & C7    | Others     |
| EMX1-SITE1   | Con          | 0.20±0.01                   | 1.44±0.08            | 45.31±0.18 | 53.05±0.26 | 0.15±0.00                    | 1.12±0.07            | 35.02±0.27 | 41.00±0.05 |
|              | A            | 0.18±0.01                   | 52.66±0.77           | 22.88±0.55 | 24.28±0.23 | 0.13±0.01                    | 36.70±0.51           | 15.96±0.83 | 16.93±0.64 |
|              | B            | 0.09±0.02                   | <b>74.78±0.31***</b> | 4.46±0.10  | 20.67±0.25 | 0.06±0.01                    | <b>50.83±0.33***</b> | 3.03±0.08  | 14.05±0.17 |
|              | C            | 0.13±0.03                   | 67.75±0.17           | 4.38±0.09  | 27.74±0.14 | 0.09±0.02                    | 47.37±0.65           | 3.06±0.05  | 19.40±0.21 |
|              |              |                             |                      |            |            |                              |                      |            |            |
| PRNP-SITE1   | Con          | 0.21±0.03                   | 48.89±0.57           | 18.89±0.23 | 32.01±0.37 | 0.17±0.02                    | 40.08±0.61           | 15.48±0.15 | 26.24±0.27 |
|              | A            | 0.10±0.00                   | 62.07±0.25           | 0.76±0.01  | 37.07±0.25 | 0.06±0.00                    | 39.13±0.04           | 0.48±0.01  | 23.37±0.27 |
|              | B            | 0.10±0.01                   | <b>76.96±0.40***</b> | 1.73±0.08  | 21.21±0.34 | 0.08±0.01                    | <b>57.92±0.36***</b> | 1.30±0.06  | 15.96±0.24 |
|              | C            | 0.09±0.01                   | 56.34±0.26           | 0.78±0.03  | 42.78±0.22 | 0.05±0.00                    | 31.97±0.27           | 0.44±0.02  | 24.28±0.10 |
|              |              |                             |                      |            |            |                              |                      |            |            |
| FANCF-SITE1  | Con          | 3.78±0.17                   | 4.61±0.18            | 73.07±0.48 | 18.54±0.16 | 2.84±0.10                    | 3.47±0.11            | 54.98±0.89 | 13.95±0.07 |
|              | A            | 14.36±0.11                  | <b>34.47±0.24***</b> | 39.77±0.44 | 11.40±0.14 | 10.17±0.14                   | <b>24.41±0.20</b>    | 28.17±0.38 | 8.07±0.11  |
|              | B            | 8.07±0.23                   | 55.00±0.29           | 25.39±0.13 | 11.53±0.21 | 2.89±0.08                    | 19.66±0.18           | 9.08±0.03  | 4.12±0.11  |
|              | C            | 30.27±0.32                  | 46.83±0.18           | 12.95±0.17 | 9.95±0.08  | 13.29±0.18                   | 20.56±0.18           | 5.69±0.13  | 4.37±0.08  |
|              |              |                             |                      |            |            |                              |                      |            |            |
| EMX1-SITE2   | Con          | 2.14±0.09                   | 1.25±0.23            | 49.50±0.37 | 47.11±0.55 | 0.83±0.03                    | 0.48±0.08            | 19.24±0.57 | 18.32±0.72 |
|              | A            | 2.24±0.12                   | <b>5.39±0.13***</b>  | 23.40±0.63 | 68.97±0.58 | 0.39±0.04                    | <b>0.94±0.03***</b>  | 4.07±0.27  | 11.97±0.42 |
|              | B            | 0.61±0.15                   | 1.98±0.17            | 19.76±0.23 | 77.65±0.39 | 0.09±0.02                    | 0.28±0.00            | 2.77±0.21  | 10.90±0.87 |
|              | C            | 1.73±0.19                   | 3.32±0.02            | 9.64±0.29  | 85.3±0.25  | 0.13±0.02                    | 0.25±0.02            | 0.72±0.05  | 6.37±0.65  |
|              |              |                             |                      |            |            |                              |                      |            |            |

Note: All data are expressed as mean ± s.d. of three independent experiments. The bold represents single-base editing with the best performance, asterisks indicate a significant difference compared with the control (\*\*\*P < 0.001).

Supplementary Table S6. A to G editing fractions of NG-ABEmax in HEK293T cells (%)

| Target genes   | gRNA & igRNA | Editing fractions of NG-ABEmax |                      |            |            | Target genes | gRNA & igRNA | Editing fractions of NG-ABEmax |                      |            |            |
|----------------|--------------|--------------------------------|----------------------|------------|------------|--------------|--------------|--------------------------------|----------------------|------------|------------|
| PSMB2          |              | A5                             | A7                   | A5 & A7    | Others     | ANO5         |              | A5                             | A7                   | A5 & A7    | Others     |
|                | Con          | 63.49±1.74                     | 0.68±0.08            | 18.57±0.63 | 17.26±1.14 |              | Con          | 10.26±0.09                     | 27.75±0.03           | 48.56±0.23 | 13.43±0.33 |
|                | A            | 80.44±0.23                     | 5.72±0.29            | 4.26±0.24  | 9.57±0.15  |              | A            | 5.64±0.33                      | <b>84.23±0.98***</b> | 3.94±0.47  | 6.19±0.54  |
|                | B            | <b>77.40±0.21***</b>           | 4.23±0.06            | 9.01±0.05  | 9.36±0.18  |              | B            | 9.81±0.33                      | 69.18±1.12           | 9.63±0.69  | 11.37±0.44 |
|                | C            | 22.88±0.46                     | 26.33±2.16           | 1.22±0.21  | 49.57±1.87 |              |              | A5                             | A6                   | A5 & A6    | Others     |
| ABCA3          |              | A5                             | A8                   | A5 & A8    | Others     | KCNQ2        | Con          | 1.39±0.18                      | 0.22±0.03            | 82.36±0.49 | 16.03±0.51 |
|                | Con          | 73.33±0.32                     | 0.14±0.01            | 22.13±0.33 | 4.40±0.01  |              | A            | <b>15.5±0.54***</b>            | 1.25±0.04            | 75.22±0.39 | 8.03±0.22  |
|                | A            | <b>84.86±0.45***</b>           | 0.30±0.02            | 11.08±0.28 | 3.75±0.24  |              | B            | 12.31±0.46                     | 1.60±0.10            | 75.38±0.49 | 10.70±0.08 |
|                | B            | 70.39±0.83                     | 1.99±0.16            | 23.62±0.58 | 4.00±0.22  |              | C            | 4.20±0.26                      | 0.33±0.01            | 80.83±0.34 | 14.64±0.20 |
|                | C            | 81.45±0.55                     | 0.18±0.02            | 13.09±2.06 | 5.28±1.71  |              |              | A5                             | A7                   | A5 & A7    | Others     |
| EMX1-SITE3     |              | A6                             | A8                   | A6 & A8    | Others     | NOTCH2       | Con          | 25.36±0.72                     | 4.95±0.14            | 61.18±0.86 | 8.51±0.06  |
|                | Con          | 48.20±0.31                     | 0.90±0.01            | 25.92±0.38 | 24.98±0.30 |              | A            | 22.77±0.50                     | 13.35±0.19           | 55.28±0.50 | 8.60±0.44  |
|                | A            | <b>72.37±0.40***</b>           | 3.18±0.16            | 10.62±0.13 | 13.82±0.24 |              | B            | 25.84±0.20                     | 34.21±0.48           | 32.42±0.58 | 7.53±0.42  |
|                | B            | 70.71±0.27                     | 7.31±0.27            | 9.06±0.35  | 12.93±0.15 |              | C            | <b>41.91±0.70***</b>           | 10.58±0.24           | 40.98±1.00 | 6.53±0.22  |
| VISTA<br>hs267 |              | A5                             | A7                   | A5 & A7    | Others     | GF11         |              | A5                             | A6                   | A5 & A6    | Others     |
|                | Con          | 61.85±0.55                     | 0.08±0.02            | 31.32±0.42 | 6.74±0.18  |              | Con          | 22.76±0.15                     | 2.70±0.10            | 71.38±0.39 | 3.16±0.22  |
|                | A            | 78.14±0.23                     | 0.08±0.00            | 16.60±0.10 | 5.18±0.14  |              | A            | 49.87±0.81                     | 15.14±0.22           | 25.63±0.46 | 9.36±0.52  |
|                | B            | <b>87.04±0.41***</b>           | 0.12±0.01            | 6.55±0.30  | 6.28±0.13  |              | B            | 39.75±1.25                     | 12.58±0.36           | 42.49±0.35 | 5.18±0.65  |
|                | C            | 40.59±1.72                     | 7.88±0.23            | 1.35±0.31  | 50.18±2.10 |              | C            | <b>48.25±0.81***</b>           | 10.86±0.42           | 37.42±0.35 | 3.47±0.38  |
| SNCA           |              | A5                             | A7                   | A5 & A7    | Others     | AGXT         | D            | 46.33±0.20                     | 11.57±0.17           | 35.62±0.25 | 6.48±0.32  |
|                | Con          | 79.73±0.41                     | 0.19±0.01            | 14.54±0.33 | 5.54±0.21  |              |              | A5                             | A7                   | A5 & A7    | Others     |
|                | A            | <b>82.63±0.37**</b>            | 0.45±0.07            | 10.50±0.13 | 6.43±0.24  |              | Con          | 15.89±0.27                     | 1.72±0.08            | 76.22±0.67 | 6.17±0.34  |
|                | B            | 80.78±0.03                     | 0.59±0.03            | 10.88±0.18 | 7.75±0.21  |              | A            | 47.15±0.12                     | 8.03±0.05            | 36.95±0.15 | 7.86±0.03  |
|                | C            | 18.91±0.59                     | 10.22±1.94           | 1.04±0.74  | 69.83±2.14 |              | B            | 28.32±0.41                     | 8.17±0.38            | 56.27±0.83 | 7.24±0.35  |
| EMX1-SITE4     |              | A5                             | A8                   | A5 & A8    | Others     | EMX1-SITE8   | C            | <b>32.78±0.33***</b>           | 5.12±0.16            | 56.43±0.45 | 5.67±0.32  |
|                | Con          | 42.70±0.27                     | 0.53±0.04            | 48.6±0.19  | 8.17±0.13  |              | D            | 40.71±0.60                     | 11.18±0.03           | 42.02±0.34 | 6.09±0.32  |
|                | A            | 62.96±0.48                     | 14.48±0.05           | 11.02±0.17 | 11.53±0.44 |              | E            | 45.11±0.47                     | 9.79±0.15            | 40.17±0.32 | 4.94±0.27  |
|                | B            | <b>66.12±0.52***</b>           | 3.78±0.23            | 22.76±0.32 | 7.34±0.11  |              | F            | 43.69±0.45                     | 9.68±0.10            | 40.90±0.30 | 5.73±0.24  |
|                | C            | 73.87±0.38                     | 1.85±0.10            | 16.19±0.26 | 8.09±0.12  |              |              | A4                             | A7                   | A4 & A7    | Others     |
| EMX1-SITE5     |              | A5                             | A7                   | A5 & A7    | Others     | PRNP-SITE2   | Con          | 39.15±0.29                     | 12.00±0.09           | 43.32±0.13 | 5.52±0.17  |
|                | Con          | 17.25±0.13                     | 4.77±0.21            | 54.58±0.34 | 23.40±0.07 |              | A            | 16.08±0.33                     | 46.21±0.34           | 20.12±0.42 | 17.59±0.45 |
|                | A            | 15.29±0.06                     | <b>40.46±0.50***</b> | 20.58±0.16 | 23.67±0.45 |              | B            | 14.45±0.14                     | <b>29.73±0.70***</b> | 48.81±0.49 | 7.01±0.17  |
|                | B            | 29.13±0.21                     | 16.98±0.24           | 37.09±0.26 | 16.80±0.27 |              | C            | 35.11±0.91                     | 12.86±0.90           | 16.29±1.76 | 35.74±1.96 |
|                | C            | 10.77±0.73                     | 53.65±1.26           | 7.46±0.81  | 28.13±0.26 |              |              | A4                             | A7                   | A4 & A7    | Others     |
| EMX1-SITE6     |              | A5                             | A7                   | A5 & A7    | Others     | Con          | 31.67±0.24   | 2.81±0.17                      | 57.85±0.34           | 7.66±0.03  |            |
|                | Con          | 8.24±0.80                      | 1.08±0.13            | 35.82±3.04 | 54.86±3.97 | A            | 38.09±0.65   | <b>47.33±0.51***</b>           | 9.20±0.48            | 5.38±0.07  |            |
|                | A            | 7.66±0.68                      | 50.97±3.88           | 11.17±1.08 | 30.20±5.63 | B            | 12.32±0.66   | 52.17±1.85                     | 2.75±0.37            | 32.75±1.62 |            |

|                | B   | <b>53.83±1.06***</b> | 8.84±0.40            | 26.84±0.92 | 10.49±0.47 |                   | A5                   | A8         | A5 & A8   | Others     |           |
|----------------|-----|----------------------|----------------------|------------|------------|-------------------|----------------------|------------|-----------|------------|-----------|
| EMX1-<br>SITE7 |     | A5                   | A6                   | A5 & A6    | Others     | SLC22A5-<br>SITE1 | Con                  | 73.56±0.33 | 8.53±0.23 | 15.33±0.34 | 2.58±0.23 |
|                | Con | 6.79±0.11            | 3.26±0.09            | 79.77±0.88 | 10.18±0.86 | A                 | <b>81.50±0.81***</b> | 11.13±0.86 | 3.61±0.13 | 3.75±0.11  |           |
|                | A   | 28.67±0.34           | <b>33.61±0.23***</b> | 12.75±0.46 | 24.97±0.65 | B                 | 76.4±0.53            | 13.67±0.63 | 4.79±0.34 | 5.15±0.41  |           |
|                | B   | 20.72±1.94           | 25.55±0.80           | 9.32±0.77  | 44.41±0.53 |                   |                      |            |           |            |           |

Note: All data are expressed as mean ± s.d. of three independent experiments. The bold represents single-base editing with the best performance, asterisks indicate a significant difference compared with the control (\*\*\*P < 0.001, \*\*P < 0.01).

Supplementary Table S7. A to G editing efficiency of NG-ABEmax in HEK293T cells (%)

| Target genes | gRNA & igRNA | Editing efficiency of NG-ABEmax |                      |            |            | Target genes | gRNA & igRNA | Editing efficiency of NG-ABEmax |                      |            |           |
|--------------|--------------|---------------------------------|----------------------|------------|------------|--------------|--------------|---------------------------------|----------------------|------------|-----------|
|              |              | A5                              | A7                   | A5 & A7    | Others     |              |              | A5                              | A7                   | A5 & A7    | Others    |
| PSMB2        | Con          | 44.22±0.97                      | 0.47±0.05            | 12.94±0.55 | 12.03±0.92 | ANO5         | Con          | 5.72±0.24                       | 15.46±0.66           | 27.05±1.07 | 7.49±0.48 |
|              | A            | 27.42±0.91                      | 1.95±0.05            | 1.46±0.13  | 3.26±0.12  |              | A            | 1.24±0.07                       | <b>18.56±0.35**</b>  | 0.87±0.11  | 1.36±0.12 |
|              | B            | <b>40.66±4.04</b>               | 2.23±0.25            | 4.73±0.46  | 4.92±0.54  |              | B            | 1.25±0.04                       | 8.80±0.14            | 1.23±0.09  | 1.45±0.06 |
|              | C            | 0.86±0.02                       | 0.99±0.07            | 0.05±0.01  | 1.87±0.09  |              |              | A5                              | A6                   | A5 & A6    | Others    |
|              |              |                                 |                      |            |            |              | Con          | 0.79±0.11                       | 0.13±0.01            | 47.12±2.69 | 9.15±0.28 |
| ABCA3        | Con          | 47.77±0.68                      | 0.09±0.01            | 14.42±0.46 | 2.86±0.06  | KCNQ2        | A            | <b>10.41±0.50***</b>            | 0.84±0.04            | 50.47±0.57 | 5.39±0.14 |
|              | A            | <b>56.72±1.64**</b>             | 0.20±0.01            | 7.40±0.24  | 2.51±0.21  |              | B            | 7.99±0.33                       | 1.04±0.09            | 48.95±1.17 | 6.95±0.22 |
|              | B            | 47.22±1.81                      | 1.33±0.08            | 15.83±0.16 | 2.68±0.12  |              | C            | 2.36±0.21                       | 0.18±0.01            | 45.33±1.64 | 8.21±0.43 |
|              | C            | 52.14±0.93                      | 0.12±0.01            | 8.39±1.38  | 3.37±1.06  |              |              | A5                              | A7                   | A5 & A7    | Others    |
|              |              |                                 |                      |            |            |              | Con          | 13.93±0.76                      | 2.72±0.18            | 33.64±2.06 | 4.67±0.23 |
| EMX1-SITE3   | Con          | 19.54±0.44                      | 0.37±0.00            | 10.51±0.23 | 10.12±0.11 | NOTCH2       | A            | 15.90±0.77                      | 9.32±0.39            | 38.57±0.98 | 5.99±0.16 |
|              | A            | <b>27.15±0.29***</b>            | 1.19±0.06            | 3.99±0.07  | 5.19±0.06  |              | B            | 10.19±1.09                      | 13.49±1.45           | 12.80±1.48 | 2.95±0.20 |
|              | B            | 13.71±0.44                      | 1.42±0.10            | 1.76±0.08  | 2.51±0.12  |              | C            | <b>22.74±0.69***</b>            | 5.74±0.10            | 22.24±1.10 | 3.54±0.02 |
|              |              |                                 |                      |            |            |              |              | A5                              | A6                   | A5 & A6    | Others    |
| VISTA hs267  | Con          | 38.10±3.82                      | 0.05±0.02            | 19.28±1.74 | 4.16±0.44  | GFII         | Con          | 9.57±0.87                       | 1.13±0.10            | 30.03±3.06 | 1.32±0.07 |
|              | A            | 57.45±0.59                      | 0.06±0.00            | 12.20±0.09 | 3.81±0.09  |              | A            | 3.35±0.15                       | 1.02±0.03            | 1.72±0.02  | 0.63±0.02 |
|              | B            | <b>64.71±0.85***</b>            | 0.09±0.01            | 4.87±0.25  | 4.67±0.14  |              | B            | 6.67±1.46                       | 2.09±0.37            | 7.08±1.33  | 0.84±0.07 |
|              | C            | 1.62±0.06                       | 0.31±0.01            | 0.05±0.01  | 2.00±0.10  |              | C            | <b>13.24±1.49*</b>              | 2.96±0.20            | 10.25±0.99 | 0.94±0.03 |
|              |              |                                 |                      |            |            |              | D            | 4.92±0.36                       | 1.23±0.10            | 3.78±0.26  | 0.69±0.03 |
| SNCA         | Con          | 34.72±1.27                      | 0.08±0.00            | 6.33±0.12  | 2.41±0.07  | AGXT         | Con          | 7.8±0.98                        | 0.84±0.08            | 37.55±5.42 | 3.01±0.27 |
|              | A            | <b>22.61±1.36</b>               | 0.12±0.02            | 2.87±0.14  | 1.76±0.11  |              | A            | 9.10±0.17                       | 1.55±0.02            | 7.13±0.15  | 1.52±0.02 |
|              | B            | 13.39±0.16                      | 0.1±0.00             | 1.80±0.03  | 1.28±0.04  |              | B            | 7.20±0.44                       | 2.08±0.18            | 14.29±0.73 | 1.84±0.05 |
|              | C            | 0.20±0.02                       | 0.11±0.02            | 0.01±0.01  | 0.73±0.06  |              | C            | <b>15.30±0.61***</b>            | 2.39±0.14            | 26.33±0.84 | 2.64±0.08 |
|              |              |                                 |                      |            |            |              | D            | 10.82±1.29                      | 2.97±0.32            | 11.15±1.15 | 1.61±0.10 |
| EMX1-SITE4   | Con          | 36.06±0.63                      | 0.44±0.03            | 41.04±0.68 | 6.9±0.07   | EMX1-SITE8   | E            | 12.82±0.87                      | 2.78±0.12            | 11.40±0.63 | 1.40±0.07 |
|              | A            | 17.82±0.27                      | 4.10±0.10            | 3.12±0.10  | 3.27±0.19  |              | F            | 13.25±1.33                      | 2.93±0.28            | 12.39±1.04 | 1.73±0.13 |
|              | B            | <b>42.36±1.07**</b>             | 2.42±0.16            | 14.58±0.30 | 4.70±0.05  |              |              | A4                              | A7                   | A4 & A7    | Others    |
|              | C            | 32.31±0.83                      | 0.81±0.05            | 7.08±0.33  | 3.54±0.16  |              | Con          | 27.01±0.43                      | 8.28±0.20            | 29.89±0.63 | 3.81±0.12 |
|              |              |                                 |                      |            |            |              | A            | 1.44±0.04                       | 4.14±0.06            | 1.80±0.04  | 1.58±0.07 |
| EMX1-SITE5   | Con          | 11.03±0.28                      | 3.05±0.19            | 34.91±0.72 | 14.97±0.40 | PRNP-SITE2   | B            | 7.31±0.09                       | <b>15.04±0.36***</b> | 24.70±0.27 | 3.55±0.08 |
|              | A            | 8.57±0.21                       | <b>22.67±0.47***</b> | 11.53±0.17 | 13.26±0.46 |              | C            | 1.17±0.07                       | 0.43±0.04            | 0.54±0.04  | 1.19±0.10 |
|              | B            | 11.23±0.23                      | 6.55±0.20            | 14.30±0.39 | 6.48±0.28  |              |              | A4                              | A7                   | A4 & A7    | Others    |
|              | C            | 1.87±0.14                       | 9.31±0.18            | 1.30±0.15  | 4.88±0.07  |              | Con          | 14.30±0.35                      | 1.27±0.07            | 26.11±0.42 | 3.46±0.07 |
|              |              |                                 |                      |            |            |              | A            | 12.28±0.78                      | <b>15.27±1.02***</b> | 2.96±0.10  | 1.73±0.08 |
| EMX1-SITE6   | Con          | 6.18±0.58                       | 0.81±0.09            | 26.86±2.20 | 41.16±3.11 | B            | 0.36±0.01    | 1.53±0.11                       | 0.08±0.01            | 0.96±0.01  |           |
|              | A            | 1.32±0.20                       | 8.76±1.21            | 1.92±0.30  | 5.10±0.58  |              |              |                                 |                      |            |           |
|              |              |                                 |                      |            |            |              |              |                                 |                      |            |           |

|                | B   | <b>14.95±0.14***</b> | 2.46±0.11         | 7.45±0.32  | 2.91±0.17 |          |     | A5                | A8        | A5 & A8   | Others    |
|----------------|-----|----------------------|-------------------|------------|-----------|----------|-----|-------------------|-----------|-----------|-----------|
| EMX1-<br>SITE7 |     | A5                   | A6                | A5 & A6    | Others    | SLC22A5- | Con | 35.30±1.04        | 4.09±0.10 | 7.35±0.21 | 1.24±0.13 |
|                | Con | 2.15±0.23            | 1.04±0.16         | 25.33±3.47 | 3.20±0.12 | SITE1    | A   | <b>11.32±0.49</b> | 1.55±0.20 | 0.50±0.01 | 0.52±0.04 |
|                | A   | 1.37±0.19            | <b>1.61±0.21*</b> | 0.61±0.10  | 1.19±0.13 |          | B   | 6.08±0.16         | 1.09±0.04 | 0.38±0.03 | 0.41±0.04 |
|                | B   | 0.67±0.12            | 0.82±0.05         | 0.30±0.03  | 1.43±0.12 |          |     |                   |           |           |           |

Note: All data are expressed as mean ± s.d. of three independent experiments. The bold represents single-base editing with the best performance, asterisks indicate a significant difference compared with the control (\*\*\*P < 0.001, \*\*P < 0.01, \*P < 0.05).

Supplementary Table S8. A to G editing fractions of NG-ABEmax in HeLa cells (%)

| Target genes | gRNA & igRNA | Editing fractions of NG-ABEmax |            |            |            | Target genes | gRNA & igRNA | Editing fractions of NG-ABEmax |                      |            |            |  |
|--------------|--------------|--------------------------------|------------|------------|------------|--------------|--------------|--------------------------------|----------------------|------------|------------|--|
|              |              | A5                             | A7         | A5 & A7    | Others     |              |              | A5                             | A7                   | A5 & A7    | Others     |  |
| PSMB2        | Con          | 49.36±0.47                     | 0.49±0.02  | 26.36±0.29 | 23.80±0.22 | ANO5         | Con          | 14.58±0.26                     | 34.37±0.38           | 39.17±0.25 | 11.88±0.14 |  |
|              | A            | 85.6±0.59                      | 5.65±0.23  | 4.24±0.32  | 4.52±0.09  |              | A            | 7.50±0.34                      | <b>81.86±2.59***</b> | 6.66±1.76  | 3.99±0.53  |  |
|              | B            | <b>79.79±0.23***</b>           | 4.40±0.05  | 8.59±0.10  | 7.21±0.16  |              | B            | 12.07±0.65                     | 73.09±1.84           | 9.64±0.93  | 5.20±0.48  |  |
|              | C            | 58.61±2.73                     | 28.76±1.31 | 5.58±1.25  | 7.05±1.84  |              |              |                                |                      |            |            |  |
|              |              |                                |            |            |            |              |              |                                |                      |            |            |  |
| ABCA3        | Con          | 74.78±0.25                     | 0.09±0.01  | 21.27±0.22 | 3.87±0.03  | KCNQ2        | Con          | 0.93±0.02                      | 0.12±0.01            | 80.86±0.06 | 18.09±0.09 |  |
|              | A            | <b>88.61±0.13***</b>           | 0.32±0.02  | 8.48±0.06  | 2.59±0.15  |              | A            | <b>12.55±0.07***</b>           | 0.60±0.02            | 76.43±0.10 | 10.42±0.13 |  |
|              | B            | 78.47±0.14                     | 2.25±0.04  | 18.38±0.09 | 0.90±0.10  |              | B            | 9.39±0.07                      | 0.85±0.02            | 76.53±0.28 | 13.22±0.30 |  |
|              | C            | 83.9±0.23                      | 0.20±0.02  | 12.86±0.17 | 3.04±0.06  |              | C            | 2.80±0.18                      | 0.10±0.01            | 78.36±0.37 | 18.74±0.50 |  |
|              |              |                                |            |            |            |              |              |                                |                      |            |            |  |
| EMX1-SITE3   | Con          | 36.16±0.06                     | 0.26±0.04  | 32.84±0.08 | 30.74±0.10 | NOTCH2       | Con          | 28.57±0.41                     | 3.83±0.15            | 62.90±0.63 | 4.70±0.11  |  |
|              | A            | <b>72.06±0.13***</b>           | 1.94±0.04  | 14.43±0.09 | 11.57±0.09 |              | A            | 27.96±0.21                     | 14.63±0.22           | 50.16±0.09 | 7.24±0.15  |  |
|              | B            | 84.68±0.41                     | 7.34±0.18  | 5.40±0.17  | 2.58±0.41  |              | B            | 26.22±0.48                     | 35.04±0.80           | 34.78±0.49 | 3.96±0.13  |  |
|              |              |                                |            |            |            |              | C            | <b>48.32±0.31***</b>           | 6.40±0.23            | 41.65±0.51 | 3.63±0.14  |  |
| VISTA hs267  | Con          | 59.74±0.39                     | 0.10±0.01  | 34.59±0.30 | 5.57±0.08  | GF11         | Con          | 16.00±0.75                     | 1.28±0.08            | 80.19±0.79 | 2.53±0.04  |  |
|              | A            | <b>89.52±0.18***</b>           | 0.06±0.01  | 7.10±0.17  | 3.33±0.17  |              | A            | 56.07±0.79                     | 13.87±0.78           | 28.10±0.01 | 1.96±0.10  |  |
|              | B            | 96.38±0.07                     | 0.15±0.01  | 1.01±0.06  | 2.45±0.09  |              | B            | 40.99±0.34                     | 10.80±0.26           | 45.94±0.07 | 2.27±0.12  |  |
|              | C            | 70.72±2.40                     | 22.14±2.30 | 4.74±0.64  | 2.41±0.48  |              | C            | <b>37.77±0.48***</b>           | 5.88±0.07            | 53.80±0.36 | 2.56±0.17  |  |
|              |              |                                |            |            |            |              | D            | 41.95±0.20                     | 6.53±0.18            | 49.07±0.42 | 2.45±0.04  |  |
| SNCA         | Con          | 77.79±0.24                     | 0.30±0.02  | 16.64±0.05 | 5.28±0.27  |              |              |                                |                      |            |            |  |
|              | A            | <b>92.87±0.17***</b>           | 0.76±0.06  | 3.43±0.23  | 2.94±0.14  |              |              |                                |                      |            |            |  |
|              | B            | 94.37±0.33                     | 1.14±0.09  | 2.16±0.27  | 2.32±0.14  |              |              |                                |                      |            |            |  |
|              | IC           | 71.47±3.79                     | 24.47±5.65 | 3.22±1.62  | 0.85±0.79  |              |              |                                |                      |            |            |  |
|              |              |                                |            |            |            |              |              |                                |                      |            |            |  |

Note: All data are expressed as mean ± s.d. of three independent experiments. The bold represents single-base editing with the best performance, asterisks indicate a significant difference compared with the control (\*\*\*P < 0.001).



Supplementary Table S9. A to G editing efficiency of NG-ABEmax in HeLa cells (%)

| Target genes | gRNA & igRNA | Editing efficiency of NG-ABEmax |           |            |            | Target genes | gRNA & igRNA | Editing efficiency of NG-ABEmax |                   |            |            |
|--------------|--------------|---------------------------------|-----------|------------|------------|--------------|--------------|---------------------------------|-------------------|------------|------------|
|              |              | A5                              | A7        | A5 & A7    | Others     |              |              | A5                              | A7                | A5 & A7    | Others     |
| PSMB2        |              | A5                              | A7        | A5 & A7    | Others     | ANOS         |              | A5                              | A7                | A5 & A7    | Others     |
|              | Con          | 42.96±0.12                      | 0.42±0.02 | 22.95±0.52 | 20.72±0.4  |              | Con          | 10.85±0.36                      | 25.57±0.27        | 29.15±0.47 | 8.84±0.24  |
|              | A            | 29.59±0.34                      | 1.95±0.09 | 1.47±0.12  | 1.56±0.02  |              | A            | 1.48±0.13                       | <b>16.11±0.37</b> | 1.33±0.43  | 0.79±0.15  |
|              | B            | <b>50.35±0.50***</b>            | 2.78±0.03 | 5.42±0.12  | 4.55±0.13  |              | B            | 1.51±0.08                       | 9.13±0.27         | 1.20±0.11  | 0.65±0.07  |
|              | C            | 0.91±0.05                       | 0.45±0.01 | 0.09±0.02  | 0.11±0.03  |              |              | A5                              | A6                | A5 & A6    | Others     |
| ABCA3        |              | A5                              | A8        | A5 & A8    | Others     | KCNQ2        |              | A5                              | A6                | A5 & A6    | Others     |
|              | Con          | 61.41±0.03                      | 0.07±0.01 | 17.47±0.23 | 3.18±0.04  |              | Con          | 0.80±0.01                       | 0.10±0.01         | 69.41±0.36 | 15.53±0.16 |
|              | A            | <b>68.66±0.46***</b>            | 0.24±0.01 | 6.57±0.08  | 2.01±0.11  |              | A            | <b>11.06±0.08***</b>            | 0.53±0.02         | 67.36±0.26 | 9.18±0.09  |
|              | B            | 60.15±0.20                      | 1.72±0.03 | 14.09±0.06 | 0.69±0.07  |              | B            | 8.43±0.09                       | 0.77±0.02         | 68.7±0.29  | 11.87±0.28 |
|              | C            | 64.93±0.16                      | 0.15±0.01 | 9.95±0.15  | 2.35±0.05  |              | C            | 2.47±0.16                       | 0.09±0.01         | 69.09±0.81 | 16.52±0.40 |
| EMX1-SITE3   |              | A6                              | A8        | A6 & A8    | Others     | NOTCH2       |              | A5                              | A7                | A5 & A7    | Others     |
|              | Con          | 27.04±1.07                      | 0.20±0.02 | 24.56±1.06 | 22.98±0.95 |              | Con          | 22.42±1.03                      | 3.01±0.22         | 49.32±1.17 | 3.69±0.20  |
|              | A            | <b>47.91±0.80***</b>            | 1.29±0.05 | 9.60±0.24  | 7.69±0.14  |              | A            | 22.48±0.11                      | 11.77±0.21        | 40.33±0.06 | 5.82±0.13  |
|              | B            | 18.01±0.09                      | 1.56±0.03 | 1.15±0.04  | 0.55±0.09  |              | B            | 16.53±0.29                      | 22.09±0.49        | 21.92±0.34 | 2.50±0.08  |
| VISTA hs267  |              | A5                              | A7        | A5 & A7    | Others     | GFI1         |              | A5                              | A6                | A5 & A6    | Others     |
|              | Con          | 44.55±0.26                      | 0.07±0.01 | 25.79±0.27 | 4.16±0.07  |              | Con          | 12.17±0.52                      | 0.98±0.06         | 61.02±0.89 | 1.93±0.03  |
|              | A            | <b>63.59±0.75</b>               | 0.04±0.00 | 5.04±0.11  | 2.36±0.11  |              | A            | 3.98±0.10                       | 0.99±0.07         | 2.00±0.06  | 0.14±0.00  |
|              | B            | 53.55±0.88                      | 0.09±0.01 | 0.56±0.04  | 1.36±0.06  |              | B            | 11.06±0.29                      | 2.91±0.02         | 12.39±0.24 | 0.61±0.04  |
|              | C            | 0.49±0.04                       | 0.15±0.01 | 0.03±0.00  | 0.02±0.00  |              | C            | <b>17.55±0.15***</b>            | 2.73±0.02         | 24.99±0.29 | 1.19±0.08  |
| SNCA         |              | A5                              | A7        | A5 & A7    | Others     |              |              |                                 |                   |            |            |
|              | Con          | 27.18±1.69                      | 0.10±0.00 | 5.81±0.35  | 1.84±0.08  |              |              |                                 |                   |            |            |
|              | A            | <b>14.18±0.63</b>               | 0.12±0.01 | 0.52±0.04  | 0.45±0.02  |              |              |                                 |                   |            |            |
|              | B            | 7.36±0.34                       | 0.09±0.01 | 0.17±0.02  | 0.18±0.02  |              |              |                                 |                   |            |            |
|              | C            | 0.27±0.02                       | 0.09±0.02 | 0.01±0.01  | 0.00±0.00  |              |              |                                 |                   |            |            |

Note: All data are expressed as mean ± s.d. of three independent experiments. The bold represents single-base editing with the best performance, asterisks indicate a significant difference compared with the control (\*\*\*P < 0.001).

Supplementary Table S10. A to G editing fractions and efficiency of NG-ABEmax without puromycin selection in HEK293T cells (%)

| Target genes | gRNA & igRNA | Editing fractions of NG-ABEmax |                      |            |            | Editing efficiency of NG-ABEmax |                  |           |           |
|--------------|--------------|--------------------------------|----------------------|------------|------------|---------------------------------|------------------|-----------|-----------|
|              |              | A5                             | A7                   | A5 & A7    | Others     | A5                              | A7               | A5 & A7   | Others    |
| ANOS         | Con          | 16.85±0.16                     | 40.91±1.15           | 32.86±0.68 | 9.38±0.37  | 4.72±0.57                       | 11.41±0.95       | 9.21±1.24 | 2.63±0.40 |
|              | A            | 9.51±0.63                      | <b>75.42±3.01***</b> | 10.23±1.98 | 4.84±0.40  | 1.19±0.13                       | <b>9.43±0.09</b> | 1.29±0.31 | 0.61±0.08 |
|              | B            | 13.53±0.72                     | 63.75±3.87           | 16.08±3.04 | 6.65±0.26  | 1.54±0.33                       | 7.13±0.72        | 1.87±0.68 | 0.76±0.16 |
| EMX1-SITE3   | Con          | 51.18±0.45                     | 3.86±0.68            | 25.89±0.33 | 19.07±0.62 | 12.47±0.50                      | 0.94±0.14        | 6.31±0.25 | 4.65±0.32 |
|              | A            | <b>74.86±0.59***</b>           | 6.92±1.19            | 12.61±0.07 | 5.60±0.65  | <b>17.41±0.43***</b>            | 1.60±0.25        | 2.93±0.07 | 1.31±0.17 |
|              | B            | 77.16±0.13                     | 12.33±0.28           | 7.64±0.13  | 2.86±0.28  | 9.46±0.18                       | 1.51±0.04        | 0.94±0.03 | 0.35±0.03 |

Note: All data are expressed as mean ± s.d. of three independent experiments. The bold represents single-base editing with the best performance, asterisks indicate a significant difference compared with the control (\*\*\*) ( $P < 0.001$ ).

Supplementary Table S11. A to G editing fractions and efficiency of ABEs in HEK293T cells (%)

| Target genes                         | gRNA & igRNA | Editing fractions of ABEs |                      |                                  |            | Editing efficiency of ABEs |                      |                                  |            |
|--------------------------------------|--------------|---------------------------|----------------------|----------------------------------|------------|----------------------------|----------------------|----------------------------------|------------|
|                                      |              | A <sup>I</sup>            | A <sup>II</sup>      | A <sup>I</sup> & A <sup>II</sup> | Others     | A <sup>I</sup>             | A <sup>II</sup>      | A <sup>I</sup> & A <sup>II</sup> | Others     |
| NOTCH2<br>(NG.ABE <sub>max</sub> )   |              | A <sup>I</sup>            | A <sup>II</sup>      | A <sup>I</sup> & A <sup>II</sup> | Others     | A <sup>I</sup>             | A <sup>II</sup>      | A <sup>I</sup> & A <sup>II</sup> | Others     |
|                                      | PAM1         | 25.36±0.72                | 4.95±0.14            | 61.18±0.86                       | 8.51±0.06  | 13.93±0.76                 | 2.72±0.18            | 33.64±2.06                       | 4.67±0.23  |
|                                      | PAM1-C       | <b>41.91±0.70***</b>      | 10.58±0.24           | 40.98±1.00                       | 6.53±0.22  | <b>22.74±0.69***</b>       | 5.74±0.10            | 22.24±1.10                       | 3.54±0.02  |
| NOTCH2<br>(SpRY-ABE <sub>max</sub> ) | PAM2         | 0.23±0.01                 | 29.59±0.41           | 44.3±0.21                        | 25.87±0.39 | 0.16±0.01                  | 19.89±0.68           | 29.77±0.83                       | 17.38±0.25 |
|                                      | PAM2-A       | 0.19±0.03                 | <b>64.28±0.27***</b> | 12.48±0.09                       | 23.05±0.23 | 0.13±0.02                  | <b>45.23±2.03***</b> | 8.78±0.38                        | 16.22±0.58 |
|                                      | PAM2-B       | 9.58±2.94                 | 58.97±0.04           | 23.23±0.75                       | 8.22±3.50  | 0.15±0.02                  | 0.96±0.15            | 0.38±0.05                        | 0.14±0.08  |
| PSMB2<br>(NG.ABE <sub>max</sub> )    |              | A <sup>I</sup>            | A <sup>II</sup>      | A <sup>I</sup> & A <sup>II</sup> | Others     | A <sup>I</sup>             | A <sup>II</sup>      | A <sup>I</sup> & A <sup>II</sup> | Others     |
|                                      | PAM1         | 63.49±1.74                | 0.68±0.08            | 18.57±0.63                       | 17.26±1.14 | 44.22±0.97                 | 0.47±0.05            | 12.94±0.55                       | 12.03±0.92 |
|                                      | PAM1-B       | <b>77.40±0.21***</b>      | 4.23±0.06            | 9.01±0.05                        | 9.36±0.18  | <b>40.66±4.04</b>          | 2.23±0.25            | 4.73±0.46                        | 4.92±0.54  |
| PSMB2<br>(SpRY-ABE <sub>max</sub> )  | PAM2         | 0.77±0.04                 | 39.32±0.46           | 0.78±0.05                        | 59.13±0.51 | 0.49±0.02                  | 25.30±0.25           | 0.50±0.03                        | 38.06±1.13 |
|                                      | PAM2-A       | 7.19±0.16                 | 73.14±0.80           | 1.67±0.11                        | 18.00±0.66 | 1.69±0.05                  | 17.17±0.13           | 0.39±0.03                        | 4.23±0.18  |
|                                      | PAM2-B       | 12.89±0.60                | 64.90±1.89           | 1.38±0.12                        | 20.83±2.46 | 1.79±0.10                  | 9.00±0.47            | 0.19±0.01                        | 2.92±0.60  |
|                                      | PAM2-C       | 8.11±0.38                 | <b>67.99±0.42***</b> | 2.25±0.08                        | 21.65±0.44 | 2.57±0.20                  | <b>21.51±0.66</b>    | 0.71±0.01                        | 6.85±0.15  |
| KCNQ2<br>(NG.ABE <sub>max</sub> )    |              | A <sup>I</sup>            | A <sup>II</sup>      | A <sup>I</sup> & A <sup>II</sup> | Others     | A <sup>I</sup>             | A <sup>II</sup>      | A <sup>I</sup> & A <sup>II</sup> | Others     |
|                                      | PAM1         | 1.39±0.18                 | 0.22±0.03            | 82.36±0.49                       | 16.03±0.51 | 0.79±0.11                  | 0.13±0.01            | 47.12±2.69                       | 9.15±0.28  |
|                                      | PAM1-A       | <b>15.5±0.54***</b>       | 1.25±0.04            | 75.22±0.39                       | 8.03±0.22  | <b>10.41±0.50***</b>       | 0.84±0.04            | 50.47±0.57                       | 5.39±0.14  |
| KCNQ2<br>(SpRY-ABE <sub>max</sub> )  | PAM2         | 2.36±0.10                 | 1.86±0.09            | 40.34±0.18                       | 55.45±0.31 | 1.80±0.10                  | 1.41±0.05            | 30.73±0.54                       | 42.25±0.79 |
|                                      | PAM2-A       | 5.59±0.24                 | <b>28.77±0.23***</b> | 39.13±0.40                       | 26.51±0.20 | 3.66±0.26                  | <b>18.82±0.67***</b> | 25.58±0.56                       | 17.33±0.40 |
|                                      | PAM2-B       | 3.33±0.18                 | 76.62±3.46           | 9.75±2.95                        | 10.3±0.40  | 0.37±0.03                  | 8.52±0.15            | 1.10±0.35                        | 1.15±0.07  |
| GF11<br>(NG.ABE <sub>max</sub> )     |              | A <sup>I</sup>            | A <sup>II</sup>      | A <sup>I</sup> & A <sup>II</sup> | Others     | A <sup>I</sup>             | A <sup>II</sup>      | A <sup>I</sup> & A <sup>II</sup> | Others     |
|                                      | PAM1         | 22.76±0.15                | 2.70±0.10            | 71.38±0.39                       | 3.16±0.22  | 9.57±0.87                  | 1.13±0.10            | 30.03±3.06                       | 1.32±0.07  |
|                                      | PAM1-C       | <b>48.25±0.81***</b>      | 10.86±0.42           | 37.42±0.35                       | 3.47±0.38  | <b>13.24±1.49*</b>         | 2.96±0.20            | 10.25±0.99                       | 0.94±0.03  |
| GF11<br>(SpRY-ABE <sub>max</sub> )   | PAM2         | 64.99±1.27                | 2.25±0.14            | 30.28±1.25                       | 2.48±0.09  | 40.95±2.02                 | 1.42±0.01            | 19.12±1.72                       | 1.57±0.15  |
|                                      | PAM2-A       | <b>71.60±0.12**</b>       | 5.32±0.06            | 21.04±0.09                       | 2.05±0.09  | <b>28.04±0.52</b>          | 2.08±0.04            | 8.24±0.14                        | 0.80±0.02  |
|                                      | PAM2-B       | 74.34±0.16                | 7.60±0.06            | 15.93±0.17                       | 2.13±0.03  | 23.34±0.20                 | 2.39±0.01            | 5.00±0.10                        | 0.67±0.01  |

Note: A<sup>I</sup> represents primarily edited bases, and A<sup>II</sup> represents the other bases that are also within the editing windows. PAM1, the control gRNAs for NG-ABE<sub>max</sub> editor exactly matched the target sequence. PAM2, the gRNAs for SpRY-ABE<sub>max</sub> editor also exactly matched the target sequence. Capital A to C, different igRNAs. All data are expressed as mean ± s.d. of three independent experiments. The bold represents single-base editing with the best performance, asterisks indicate a significant difference compared with the control (\*\*\*P < 0.001, \*\*P < 0.01, \*P < 0.05).

Supplementary Table S12. A to G editing fractions and efficiency of NG-ABEmax with different time for ANO5 loci in HEK293T cells (%)

| gRNA & igRNA | Time (h) | Editing fractions of NG-ABEmax |            |            |            | Editing efficiency of NG-ABEmax |            |            |           |
|--------------|----------|--------------------------------|------------|------------|------------|---------------------------------|------------|------------|-----------|
|              |          | A5                             | A7         | A5 & A7    | Others     | A5                              | A7         | A5 & A7    | Others    |
| Con          | 24       | 19.91±0.67                     | 42.62±0.87 | 23.20±0.25 | 14.27±0.20 | 3.44±0.15                       | 7.37±0.17  | 4.01±0.11  | 2.47±0.01 |
|              | 48       | 16.57±0.38                     | 37.26±0.23 | 33.56±0.65 | 12.61±0.06 | 5.00±0.15                       | 11.24±0.35 | 10.13±0.53 | 3.80±0.13 |
|              | 72       | 13.83±0.12                     | 35.22±1.03 | 37.25±0.99 | 13.7±0.11  | 5.93±0.29                       | 15.08±0.20 | 15.99±1.07 | 5.87±0.21 |
|              | 96       | 13.28±0.32                     | 32.83±0.51 | 40.00±0.53 | 13.89±0.22 | 6.79±0.36                       | 16.78±0.44 | 20.46±1.04 | 7.10±0.32 |
|              | 120      | 12.01±1.44                     | 33.32±3.86 | 39.71±2.95 | 14.96±8.13 | 6.82±0.25                       | 18.91±0.11 | 22.67±1.32 | 9.15±5.83 |
|              | 144      | 11.17±0.06                     | 32.78±0.20 | 41.47±0.01 | 14.57±0.13 | 6.83±0.06                       | 20.06±0.40 | 25.37±0.34 | 8.91±0.04 |
| A            | 24       | 10.42±1.28                     | 57.47±1.34 | 6.52±1.84  | 25.6±1.99  | 0.62±0.13                       | 3.36±0.25  | 0.39±0.14  | 1.49±0.05 |
|              | 48       | 9.10±0.33                      | 67.84±1.53 | 8.32±1.34  | 14.74±0.30 | 1.08±0.08                       | 8.00±0.15  | 0.99±0.20  | 1.74±0.05 |
|              | 72       | 7.47±0.69                      | 73.99±2.16 | 7.87±1.45  | 10.67±0.06 | 1.43±0.15                       | 14.10±0.35 | 1.51±0.31  | 2.03±0.07 |
|              | 96       | 7.10±0.73                      | 74.04±2.41 | 8.85±1.16  | 10.01±0.54 | 1.62±0.16                       | 16.97±0.83 | 2.03±0.26  | 2.29±0.11 |
|              | 120      | 6.80±0.48                      | 72.45±2.91 | 10.58±0.51 | 10.17±2.24 | 2.06±0.17                       | 21.95±0.60 | 3.21±0.17  | 3.09±0.74 |
|              | 144      | 6.76±0.23                      | 71.88±2.24 | 12.37±1.48 | 8.99±0.60  | 2.02±0.13                       | 21.38±0.04 | 3.70±0.56  | 2.68±0.25 |

Note: All data are expressed as mean ± s.d. of three independent experiments.

Supplementary Table S13. The off-target site analysis of CBE targets\*

| Target genes | gRNA & igRNA | Protospacer          | Number of off-target site | Target genes   | gRNA & igRNA         | Protospacer          | Number of off-target site |
|--------------|--------------|----------------------|---------------------------|----------------|----------------------|----------------------|---------------------------|
| HIRA         | Con          | GTCATCTTTACCCCAGAGCG | 6                         | EMX1-<br>site1 | Con                  | GAGCCTCGAATGCCAAGCTT | 43                        |
|              | A            | GTtATCTTTACCCCAGAGCG | 5                         |                | A                    | GAGaCTCGAATGCCAAGCTT | 11                        |
|              | B            | GTCATgTTTACCCCAGAGCG | 3                         |                | B                    | GatgCTCGAATGCCAAGCTT | 5                         |
|              | C            | GatATCTTTACCCCAGAGCG | 1                         |                | C                    | GgtaCTCGAATGCCAAGCTT | 7                         |
|              | D            | GatcTCTTTACCCCAGAGCG | 2                         |                | FANCF-<br>site1      | Con                  | CCACTGCAAGGCCCGCGCA       |
| DNMT3B       | Con          | GACACGTCTGTGTAGTGAC  | 3                         | A              |                      | CtACTGCAAGGCCCGCGCA  | 5                         |
|              | A            | GATACGTCTGTGTAGTGAC  | 2                         | B              |                      | CCAgTGCAGGCCCGCGCA   | 16                        |
|              | B            | GACACGTtTGTGTAGTGAC  | 3                         | C              |                      | CttTGCAGGCCCGCGCA    | 12                        |
|              | C            | GtACGTCTGTGTAGTGAC   | 6                         | Con            |                      | CACGGTCACCACAACCACCA | 25                        |
| RNF2         | Con          | GTCATCTTAGTCATTACCTG | 7                         | PRNP-<br>site1 | A                    | CAtGGTCACCACAACCACCA | 34                        |
|              | A            | GTtATCTTAGTCATTACCTG | 10                        |                | B                    | CgCGGTCACCACAACCACCA | 4                         |
|              | B            | GTCATgTTAGTCATTACCTG | 7                         |                | C                    | CttGGTCACCACAACCACCA | 16                        |
|              | C            | GatATCTTAGTCATTACCTG | 7                         | EMX1-<br>site2 | Con                  | TCATACCATAATGAAATGTT | 19                        |
|              | D            | GatcTCTTAGTCATTACCTG | 15                        |                | A                    | TaATACCATAATGAAATGTT | 17                        |
| RNF216       | Con          | GTGTCCTTTGAGCTCGTGCA | 11                        | B              | TCgTACCATAATGAAATGTT | 4                    |                           |
|              | A            | GTGTcTTTTGAGCTCGTGCA | 8                         | C              | TggTACCATAATGAAATGTT | 15                   |                           |
|              | B            | GTaTcTTTTGAGCTCGTGCA | 7                         |                |                      |                      |                           |
| NSD1         | Con          | GGCATCAGTGTGACATCTGC | 24                        |                |                      |                      |                           |
|              | A            | GGtATCAGTGTGACATCTGC | 22                        |                |                      |                      |                           |
|              | B            | GatATCAGTGTGACATCTGC | 13                        |                |                      |                      |                           |

\* the prediction was performed with Cas-OFFinder (<http://www.rgenome.net/cas-offinder/>) with condition of up to 3 mismatches, no bulges.

Supplementary Table S14. The off-target analysis of ABE targets\*

| Target genes | gRNA & igRNA | Protospacer           | Number of Mismatch ( $\leq 3$ ) | Target genes  | gRNA & igRNA | Protospacer           | Number of Mismatch ( $\leq 3$ ) |    |
|--------------|--------------|-----------------------|---------------------------------|---------------|--------------|-----------------------|---------------------------------|----|
| SNCA         | Con          | GAACACAATGCATAGATTGC  | 11                              | ANO5          | Con          | TCACACACTTGATCACAGAG  | 7                               |    |
|              | A            | GATCACAAATGCATAGATTGC | 6                               |               | A            | TgACACACTTGATCACAGAG  | 9                               |    |
|              | B            | GAActCAATGCATAGATTGC  | 8                               |               | B            | TCAtAGACTTGATCACAGAG  | 8                               |    |
|              | C            | GAtgACAATGCATAGATTGC  | 13                              |               | Con          | GGTGACCATCCGGATATTCC  | 6                               |    |
| EMX1-site3   | Con          | GGAGCACACATGCCAGGTG   | 22                              | SLC22A5-site1 | A            | GcTGACCATCCGGATATTCC  | 3                               |    |
|              | A            | GGtGCACACATGCCAGGTG   | 36                              |               | B)           | GGaGACCATCCGGATATTCC  | 13                              |    |
|              | B            | GGAcCACACATGCCAGGTG   | 13                              |               | Con (PAM1)   | TGGGAAGGGTTTCCAGAGGA  | 48                              |    |
| EMX1-site4   | Con          | GGTATCATAAGAGAATCAC   | 10                              | GF11          | A            | TGGtAAGGGTTTCCAGAGGA  | 21                              |    |
|              | A            | GtCTATCATAAGAGAATCAC  | 4                               |               | B            | TcGGAAGGGTTTCCAGAGGA  | 23                              |    |
|              | B            | GaCTATCATAAGAGAATCAC  | 18                              |               | C            | TaGGAAGGGTTTCCAGAGGA  | 43                              |    |
|              | C            | GGCTcTATAAGAGAATCAC   | 15                              |               | D            | TGaGAAGGGTTTCCAGAGGA  | 47                              |    |
| EMX1-site5   | Con          | CGAGAGAAAGGAGGTATCAC  | 12                              |               | PAM2         | TGTGGGAAGGGTTTCCAGAG  | 38                              |    |
|              | A            | CGgGAGAAAGGAGGTATCAC  | 11                              |               | PAM2-A       | TcTGGGAAGGGTTTCCAGAG  | 29                              |    |
|              | B            | CGAgTAAAGGAGGTATCAC   | 12                              |               | PAM2-B       | TGaGGGAAGGGTTTCCAGAG  | 54                              |    |
|              | C            | CtAGAGAAAGGAGGTATCAC  | 22                              |               | Con          | GAAGAGCAGGGTCATGAAGG  | 35                              |    |
| EMX1-site6   | Con          | TGATACATGGAATGAGGGAA  | 24                              |               | ABCA3        | A                     | GAtGAGCAGGGTCATGAAGG            | 39 |
|              | A            | TtATACATGGAATGAGGGAA  | 51                              |               |              | B                     | GcAGAGCAGGGTCATGAAGG            | 42 |
|              | B            | TGAtcCATGGAATGAGGGAA  | 23                              | C             |              | GAAGAAcAGGGTCATGAAGG  | 53                              |    |
| EMX1-site7   | Con          | ATGGAATGAGGGAAAGGGCTA | 43                              | PSMB2         | Con (PAM1)   | GTAACAAGGCATAGACTGA   | 19                              |    |
|              | A            | AaGGAATGAGGGAAAGGGCTA | 98                              |               | A            | GttAACAAAGCATAGACTGA  | 13                              |    |
|              | B            | AttGAATGAGGGAAAGGGCTA | 22                              |               | B            | GTAAtCAAAGCATAGACTGA  | 12                              |    |
| EMX1-site8   | Con          | CACAGCAGTGACCGAGAGAA  | 28                              | PSMB2         | C            | GtttACAAGGCATAGACTGA  | 20                              |    |
|              | A            | CAtAGCAGTGACCGAGAGAA  | 8                               |               | PAM2         | AAACAAGGCATAGACTGAGG  | 29                              |    |
|              | B            | CACgCAGTGACCGAGAGAA   | 8                               |               | PAM2-A       | AAtCAAAGGCATAGACTGAGG | 14                              |    |
|              | C            | CACAcCAGTGACCGAGAGAA  | 12                              |               | PAM2-B       | AgACAAGGCATAGACTGAGG  | 16                              |    |
| PRNP-site2   | Con          | GAGATCAGGAGGATCACAGG  | 27                              | NOTCH2        | Con (PAM1)   | TGACACAGGAGACCTGTCCAC | 17                              |    |
|              | A            | GtGATCAGGAGGATCACAGG  | 23                              |               | A            | TGgCACAGGAGACCTGTCCAC | 18                              |    |
|              | B            | GAcATCAGGAGGATCACAGG  | 28                              |               | B            | TaACACAGGAGACCTGTCCAC | 12                              |    |
| AGXT         | Con          | AAGGAGATGAGCGAGGTCCC  | 22                              |               | NOTCH2       | C                     | TGACAtAGGAGACCTGTCCAC           | 8  |
|              | A            | AAGcAGATGAGCGAGGTCCC  | 10                              |               |              | PAM2                  | ACACAGGAGACCTGTCCACAG           | 22 |
|              | B            | AAGtAGATGAGCGAGGTCCC  | 6                               |               |              | PAM2-A                | AtACAGGAGACCTGTCCACAG           | 19 |
|              | C            | AAGaAGATGAGCGAGGTCCC  | 15                              |               |              | PAM2-B                | ACgCAGGAGACCTGTCCACAG           | 10 |
|              | D            | AAaGAGATGAGCGAGGTCCC  | 17                              |               |              | Con (PAM1)            | GAAGAAGGAGACCCGATGA             | 17 |
|              | E            | AAcGAGATGAGCGAGGTCCC  | 2                               |               |              | A                     | GAcGAAGGAGACCCGATGA             | 11 |
|              | F            | AAtGAGATGAGCGAGGTCCC  | 9                               |               |              | B                     | GtAGAAGGAGACCCGATGA             | 10 |
| VISTA-hs267  | Con          | GAACACAAAGCATAGACTGC  | 14                              | KCNQ2         | C            | GAAGAtGGAGACCCGATGA   | 15                              |    |
|              | A            | GtACACAAAGCATAGACTGC  | 13                              |               | PAM2         | AAGAAGGAGACCCGATGAG   | 19                              |    |
|              | B            | GAAgACAAAGCATAGACTGC  | 34                              |               | PAM2-A       | AtGAAGGAGACCCGATGAG   | 13                              |    |
|              | C            | GtAgACAAAGCATAGACTGC  | 16                              |               | PAM2-B       | AAcAAGGAGACCCGATGAG   | 3                               |    |

\* the prediction was performed with Cas-OFFinder (<http://www.rgenome.net/cas-offinder/>) with condition of up to 3 mismatches, no bulges.
